# Supplementary material for: Coordination polymer glass from a protic ionic liquid: proton conductivity and mechanical properties as an electrolyte
Source: PubMed Central journal article supplement (PMC8159284; doi:10.1039/d0sc01737j), 2020-04-17
Supplement: SC-011-D0SC01737J-s001.pdf [file SC-011-D0SC01737J-s001.pdf]

*Supporting Information for*

**Coordination Polymer Glass from Protic Ionic Liquid:  
Proton Conductivity and Mechanical Property as  
Electrolyte**

Tomohiro Ogawa,<sup>a,b</sup> Kazuki Takahashi,<sup>c</sup> Sanjog S. Nagarkar,<sup>a</sup> Koji Ohara,<sup>d</sup> You-lee Hong,<sup>b,e</sup>  
Yusuke Nishiyama,<sup>e,f</sup> and Satoshi Horike<sup>\*,a,b,g,h</sup>

<sup>[a]</sup>AIST-Kyoto University Chemical Energy Materials Open Innovation Laboratory (ChEM-OIL), National Institute of Advanced Industrial Science and Technology (AIST), Yoshida-Honmachi, Sakyo-ku, Kyoto 606-8501, Japan

<sup>[b]</sup>Institute for Integrated Cell-Material Sciences, Institute for Advanced Study, Kyoto University, Yoshida-Honmachi, Sakyo-ku, Kyoto 606-8501, Japan

<sup>[c]</sup>Advanced Research and Innovation Center, DENSO CORPORATION, 500-1 Minamiyama, Komenoki-cho, Nisshin, Aichi 470-0111, Japan

<sup>[d]</sup>Diffraction and Scattering Division, Center for Synchrotron Radiation Research, Japan Synchrotron Radiation Research Institute (JASRI), Kouto, Sayo, Hyogo 679-5198, Japan

<sup>[e]</sup>RIKEN-JEOL Collaboration Center, Yokohama, Kanagawa 230-0045, Japan

<sup>[f]</sup>NMR Science and Development Division, RIKEN SPring-8 Center, Yokohama, Kanagawa 230-0045, Japan, and JEOL RESONANCE Inc., Akishima, Tokyo 196-8558, Japan

<sup>[g]</sup>Department of Synthetic Chemistry and Biological Chemistry, Graduate School of Engineering, Kyoto University, Katsura, Nishikyo-ku, Kyoto 615-8510, Japan

<sup>[h]</sup>Department of Materials Science and Engineering, School of Molecular Science and Engineering, Vidyasirimedhi Institute of Science and Technology, Rayong, 21210, Thailand

## Table of contents

### Experimental

**Scheme S1.** Synthetic scheme of **1** and **2**.

**Table S1.** VFT fitting parameters of H<sup>+</sup> conductivity.

**Fig. S1.** Solid-state <sup>1</sup>H NMR spectra of **1** and **2** at 20 °C.

**Fig. S2.** Solid-state <sup>31</sup>P NMR spectra of **1** and **2**.

**Fig. S3.** IR spectra of **1** and **2**.

**Fig. S4.** TGA and DSC curves of **1** under inert atmosphere.

**Fig. S5.** DMA of **1** and **2** from -20 °C to 120 °C.

**Fig. S6.** XAFS spectra of Zn K-edge of **1** and references.

**Fig. S7.** Nyquist plots of **1** and **2**.

**Fig. S8.** Nyquist plots and fitting curve of **1** and **2** at 120 °C.

**Fig. S9.** Equivalent circuit for the fitting of impedance measurements.

**Fig. S10.** Bode plots for the impedance measurements and an equivalent circuit model.

**Fig. S11.** OCV of a H<sub>2</sub>/O<sub>2</sub> fuel cell using **1** as an electrolyte without PTFE membrane.

**Table S2.** Simulated RMC structure in cif format.

### References

## EXPERIMENTAL

Materials and methods: ZnO (99.99% trace metals basis) and diethylmethylamine were purchased from Aldrich, and phosphoric acid (85% in H<sub>2</sub>O) was purchased from Wako pure chemical industries. All reagents were used without further purification process. The reported ionic liquid (dema)(H<sub>2</sub>PO<sub>4</sub>) (**2**) was synthesized according to the literature method.<sup>1</sup>

Synthesis: Synthesis of Zn-dema-H<sub>2</sub>PO<sub>4</sub> (**1**): ZnO (3.25 g, 0.04 mol) and 3 equimolar of phosphoric acid (85%) (8.18 mL, 0.12 mol) were mixed and grinded in a mortar until form transparent colorless liquid, then, excess H<sub>3</sub>PO<sub>4</sub> was neutralized by addition of 1 equimolar diethylmethylamine (4.84 mL, 0.04 mol) and grinding for 30 min. Then resulting transparent colorless liquid was transferred to a round bottom flask and dried under reduced pressure at room temperature for 8 h and then at 120 °C for 2h. After cooling to room temperature, transparent high viscoelastic colorless material was obtained (13.9 g). The chemical composition of **1** was determined by solid-state NMR and elemental analysis. (dema)<sub>0.35</sub>[Zn(H<sub>2</sub>PO<sub>4</sub>)<sub>2.35</sub>(H<sub>3</sub>PO<sub>4</sub>)<sub>0.65</sub>]. Elemental analysis calcd for C<sub>1.75</sub>H<sub>11.55</sub>N<sub>0.35</sub>O<sub>12</sub>P<sub>3</sub>Zn: C, 5.42; H, 3.00; N, 1.26, found C, 5.64; H, 3.36; N, 1.30. Density = 1.87 g cm<sup>-3</sup>.

Thermogravimetric analysis (TGA) were recorded using Rigaku TG8120 instrument under flowing N<sub>2</sub> with 10 K min<sup>-1</sup> scan rate. Differential Scanning Calorimetry (DSC) experiments were measured using Hitachi DSC 7020 instrument in an inert argon atmosphere. The sample was placed in an aluminum sample folder and a lid.

Impedance spectra from 30 °C to 120 °C under Ar atmosphere were collected using a BioLogic VSP-300 with an EC Frontier sample cell (SB1A,  $\phi = 13$  mm,  $d = 5$  mm). The frequency ranges from 0.1 Hz to 1.0 MHz with a sinus voltage (10 mV) was collected at each temperature. The measurements were performed at thermal equilibrium after holding 30 min at each temperature. Collected impedance data were treated and analyzed by a ZView software. The VFT (eq. 1) fitting (Levenberg-Marquardt Method) was performed using an Origin 2018 software.

$$\sigma(T) = A \exp\left(\frac{-B}{T-T_0}\right) \quad (\text{eq. 1})$$

$A$  is proportional to the concentration of the carrier ions,  $B$  is the pseudo activation energy for the ion conduction, while  $T_0$  is the ideal glass transition temperature.

Proton Transport number ( $t_{H^+}$ ) was determined by the electromotive force (EMF) measurements using a BioLogic VSP-300. A membrane filter (Omnipore™ Merck, 10.0  $\mu$ M, 2 X 2 cm) was impregnated with **1** or **2** at 120 °C or at room temperature, respectively. The membrane was then sandwiched between Pt loaded carbon papers (1.5 mg cm<sup>-2</sup>,  $\phi$  = 5 mm, Chemix Co. Ltd.) and placed into a single cell with straight gas flow channels. On one side H<sub>2</sub>/Ar (3.99 vol%), was fed continuously while on the other side the H<sub>2</sub>/Ar gas was diluted with N<sub>2</sub> (99.99995 vol%) gas to achieve variable partial pressures. The H<sub>2</sub> concentration was precisely controlled by mass flow controllers (SEC-E40, Horiba, ltd.) while maintaining total gas flow rate of 100 mL/min on both the sides. The assembly was maintained at desired temperature using Oven and stabilized for ~10 min before measurement. The EMF generated between the sensing and counter electrodes were measured under different H<sub>2</sub> partial pressures ( $P_2$ ) on equilibrating for 3 min. The proton transport number ( $t_{H^+}$ ) is calculated using following equation

$$E = t \frac{RT}{2F} \ln \left( \frac{P_1}{P_2} \right) \text{ (eq. 2)}$$

where,  $E$ ,  $T$ ,  $R$ ,  $F$ ,  $P_1$ ,  $P_2$ , and  $t$  denote EMF, temperature, the gas constant, Faraday constant, partial pressure of H<sub>2</sub> gas, and transport number, respectively.

The polarization curves of a H<sub>2</sub>/O<sub>2</sub> fuel cell were recorded using a Solartron SI 1287. Gas diffusion electrodes (0.3 mg/cm<sup>2</sup>, 46.5 wt% Pt/C) for both cathode and anode were fabricated by spray coating of 46.5wt% Pt/C (TEC10E50E, Tanaka Kikinzoku, ltd.) onto the carbon paper gas diffusion layer (Sigracet® 29 BC, SGL Carbon, GmbH.). A membrane electrode assembly (MEA) was prepared by sandwiching the electrolyte membrane between two gas diffusion electrodes, and the contact area between electrode and electrolyte were  $\phi$  = 7 mm. The resulting MEA was installed into a single cell with straight gas flow channels, and the dry H<sub>2</sub> (>99.999vol%) and O<sub>2</sub> (>99.999vol%) gases were supplied to the single cell at a flow rate of both 100mL/min under anhydrous conditions. The flow rate was controlled by mass flow controllers (SEC-E40, Horiba, ltd.). The polarization curves of the single cell were measured at 120 °C.

Extended X-ray Absorption Fine-Structure Spectroscopy were collected on beamline BL14B2 at SPring-8. X-ray absorption spectra in the energy region of the Zn K-edge were measured in transmission mode. Fourier transformation was  $k^3$ -weighted in the  $k$  range from 3.0 to 12.5 Å<sup>-1</sup>. The data processing and coordination number fitting were performed with Athena and Artemis software, respectively. All samples were measured under Ar atmosphere. The resulting  $k^3$ -weighted radial distribution function of **1** was fitted by a FEFF calculation using first Zn-O single scattering path of Zn(SO<sub>4</sub>)·7H<sub>2</sub>O.

X-ray total scattering data were collected with four CdTe and two Ge detectors covering the  $Q$  range up to  $25 \text{ \AA}^{-1}$  at SPring-8 on beamline BL04B2 (61.377 keV;  $\lambda = 0.2020 \text{ \AA}$ ). The collected scattering data was applied absorption, background, and Compton scattering corrections, and then normalized to give the Faber–Ziman total structure factor  $S(Q)$ .<sup>2,3</sup> Then, the pair distribution function was calculated by Fourier transforming the  $S(Q)$  with a Lorch modification function.<sup>4</sup>

Reverse Monte Carlo structural modeling of amorphous state of **1** (a cubic cell;  $a = b = c = 27.44 \text{ \AA}$ ) was performed using the RMC++ program.<sup>5</sup> The initial structure was generated by random command. The initial configuration was converted by hard-sphere Monte Carlo simulations with constraints applied to avoid unrealistic structures. The closest distance, bond angles and bond length constraints were performed to form reasonable diethylmethylammonium cations and  $\text{H}_2\text{PO}_4^-/\text{H}_3\text{PO}_4$  structures (the constraints were listed below). The closest atom–atom distance was chosen based on the information from related crystal structures of  $\text{TBA}(\text{H}_2\text{PO}_4)$  and  $\text{Zn}_3(\text{PO}_4)_2 \cdot 4\text{H}_2\text{O}$ . After the hard-sphere Monte Carlo simulations, RMC simulations containing X-ray  $S(Q)$  and  $k^3\chi(k)$  EXAFS data were performed with the constraint of averaged coordination number of Zn-O = 4.6. The EXAFS back scattering tables were prepared by the FEFF<sup>6</sup> calculations. The reported atomic scattering factors and anomalous scattering factors of each atoms were used for these calculations. The protons were put using constraints and RMC simulations, although the X-ray  $S(Q)$  experimental data does not include much information from protons. Therefore, the position of protons from RMC structure was not used for discussion of proton conducting mechanism.

The list of constraints applied in RMC structural modeling is listed as follows

| Bond constraints | distance ( $\text{\AA}$ ) | Angle constraints | degree ( $^\circ$ ) |
|------------------|---------------------------|-------------------|---------------------|
| N-C              | 1.45-1.60                 | C-N-C             | 110                 |
| C-C              | 1.45-1.60                 | C-C-N             | 110                 |
| C-H              | 0.80-1.00                 | C-N-H             | 110                 |
| N-H              | 0.80-1.00                 | C-C-H             | 110                 |
| P-O              | 1.45-1.70                 | H-C-H             | 110                 |
| O-H              | 0.80-1.00                 | O-P-O             | 110                 |
| Zn-O             | 1.80-2.20                 | P-O-H             | 110                 |
|                  |                           | O-Zn-O            | 105                 |

Solid-state NMR experiments were performed on JNM-ECZ600R spectrometer (JEOL RESONANCE Inc., Japan) at 14.01 T with a  $^1\text{H}$  resonance frequency of 599.7 MHz, equipped with a 2.0 mm double resonance MAS probe (JEOL RESONANCE Inc, Japan). 1D  $^1\text{H}$  and  $^{31}\text{P}$  spectra, and  $^1\text{H}$   $T_2$  relaxation time were measured by single pulse and spin-echo pulse sequence, respectively, at 20 kHz spinning rate in the temperature range of 0-100 °C. RF field strength of  $^1\text{H}$  and  $^{31}\text{P}$  nuclei was 121.95 kHz at the  $\pi/2$  pulse width of 1.98  $\mu\text{s}$  and 131.58 kHz at the  $\pi/2$  pulse width of 1.9  $\mu\text{s}$ , respectively. The spectra were processed with the Delta software (JEOL RESONANCE Inc).

Laboratory scale powder X-ray radiation diffraction patterns were collected on a Rigaku SmartLab multipurpose diffractometer ( $\text{CuK}\alpha$ ;  $\lambda = 1.540598 \text{ \AA}$ ).

FT-IR spectra were measured with a Thermo Scientific Nicolet Summit FT-IR equipped with a diamond ATR accessory.

Variable-temperature viscoelastic measurement was performed by using a rotational parallel-plate rheometer (Rheosol-G5000, UBM Co., Ltd.) under dry  $\text{N}_2$  flow with applying oscillatory strain of 1 Hz. The sample-holding gap was set to 1.0 mm.

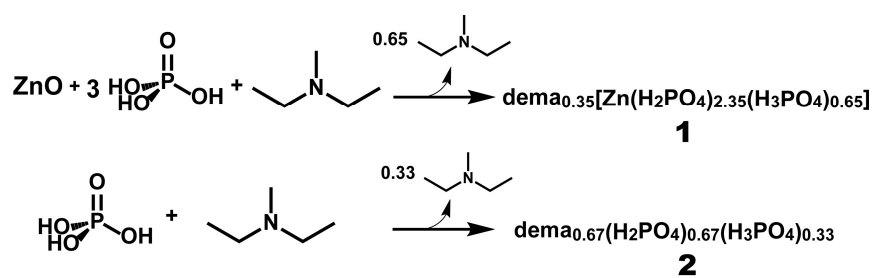

**Scheme S1.** Synthetic scheme of **1** (top) and **2** (bottom).

**Table S1.** VFT fitting parameters of  $\text{H}^+$  conductivity using eq. 1.

|          | $A$ ( $\text{S cm}^{-1}$ ) | $B$ (K)            | $T_0$ (K)         | $R^2$ |
|----------|----------------------------|--------------------|-------------------|-------|
| <b>1</b> | 4.8 ( $\pm 3.3$ )          | 1400 ( $\pm 294$ ) | 155 ( $\pm 21$ )  | 0.999 |
| <b>2</b> | 8.2 ( $\pm 1.6$ )          | 1600 ( $\pm 74$ )  | 179 ( $\pm 4.4$ ) | 0.999 |

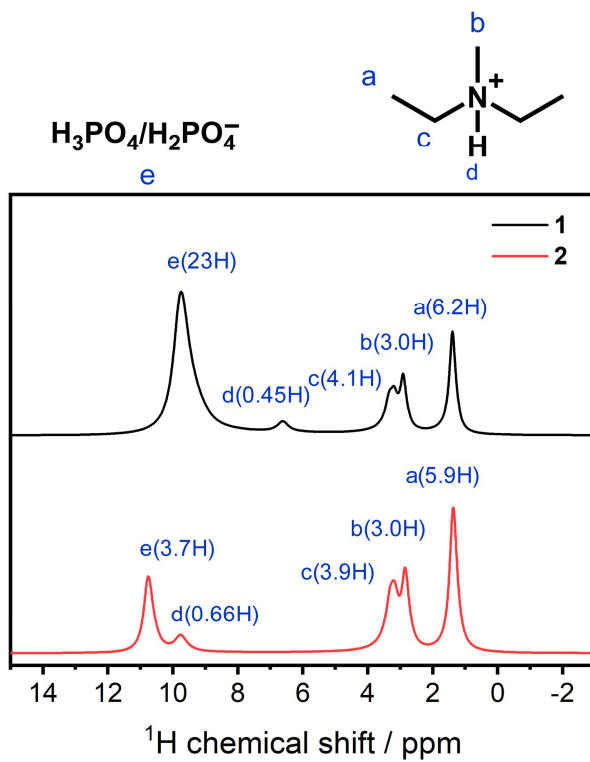

**Fig. S1.** Solid-state  $^1\text{H}$  NMR spectra of **1** (black) and **2** (red) at 20 °C. The assignments and integration values are also shown.



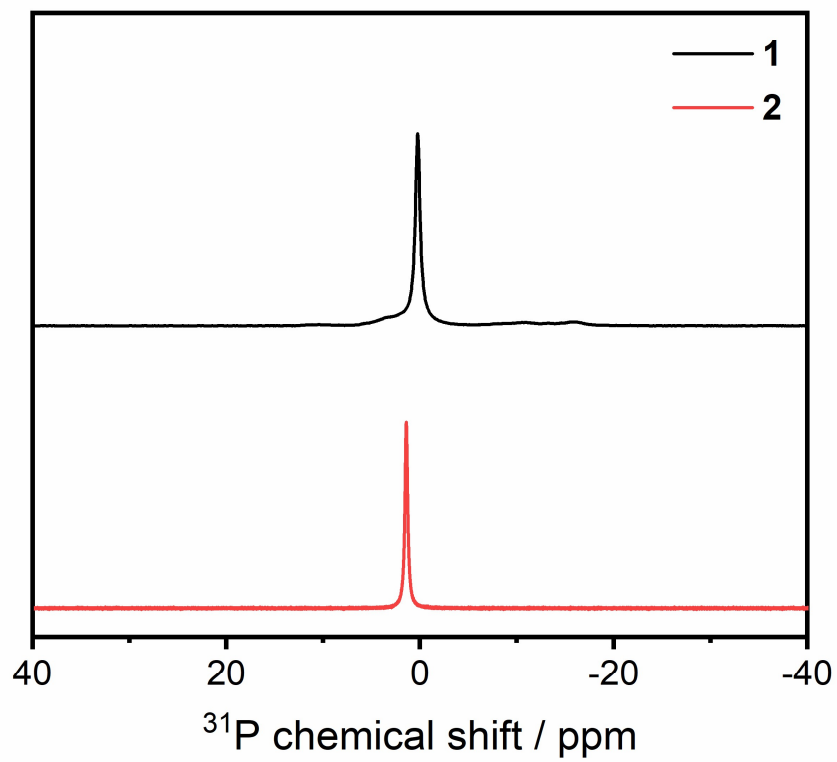

**Fig. S2.** Solid-state  $^{31}\text{P}$  NMR spectra of **1** (black) and **2** (red) at 20 °C.

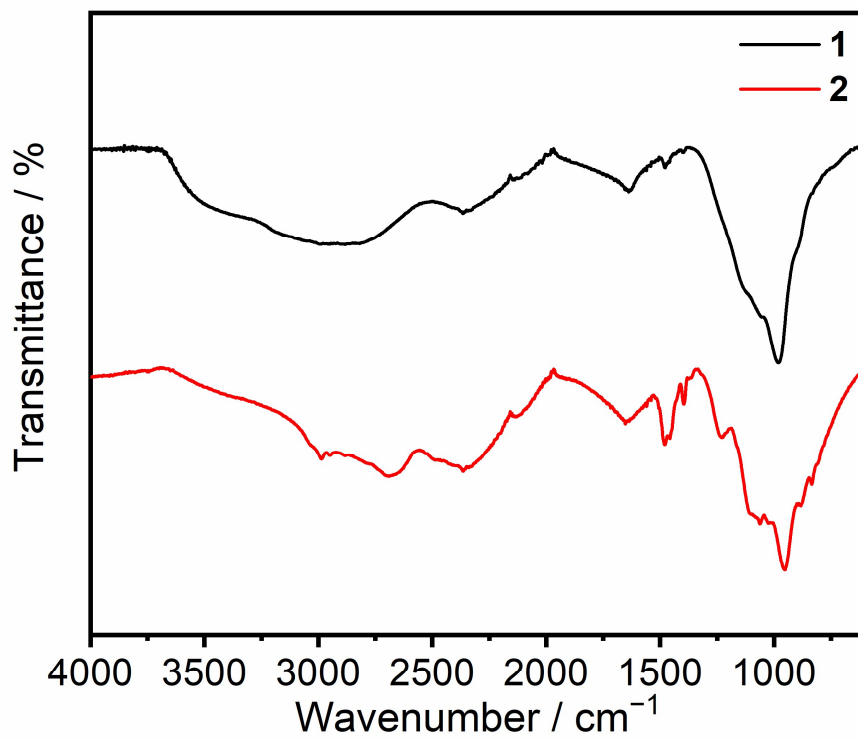

**Fig. S3.** IR spectra of **1** (black) and **2** (red) at room temperature.

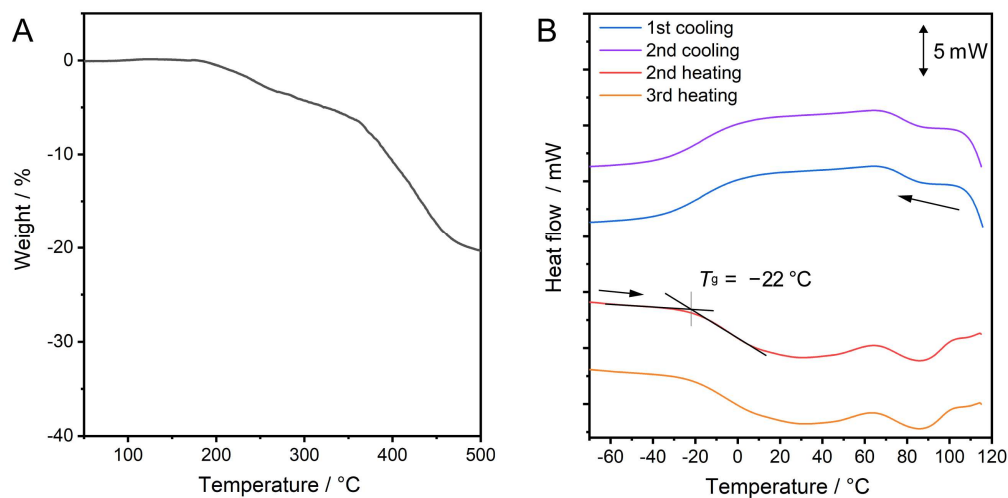

**Fig. S4.** (A) TGA curve of **1** under N<sub>2</sub> atmosphere (scan rate = 10 °C min<sup>-1</sup>) and (B) DSC curves of first (blue) and second (purple) cooling, second (red) and third (orange) heating scans of **1** after initial first heating from room temperature under Ar atmosphere (scan rate = 10 °C min<sup>-1</sup>). The viscoelastic **1** exhibited glass transition during cooling scan. Then, we determine the glass transition point in following heating scan ( $T_g = -22$  °C). There is no peak assignable to crystallization up to 120 °C. However, continuous base line change around 60-100 °C cannot be assigned at this time. While the DMA properties at this temperature range exhibited similar complicated shape, this DSC baseline change is probably due to the change of coordination structures in Zn coordination polymer.

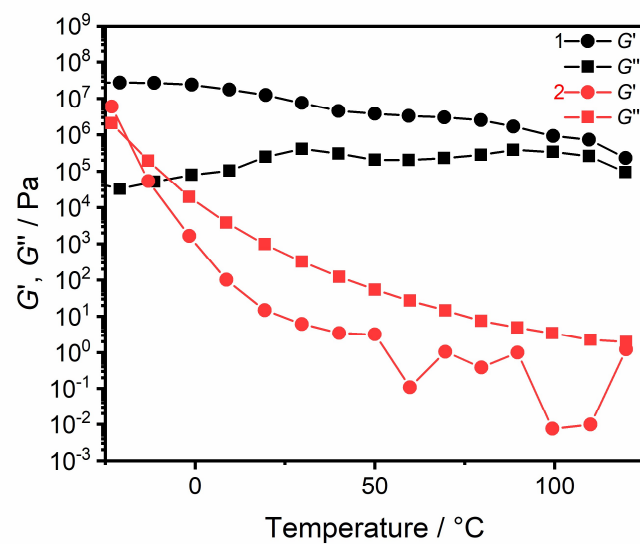

**Fig. S5.** DMA of **1** (black) and **2** (red) from  $-20\text{ }^{\circ}\text{C}$  to  $120\text{ }^{\circ}\text{C}$ . The storage modulus and loss modulus were marked by circles ( $\bullet$ ) and squares ( $\blacksquare$ ), respectively.

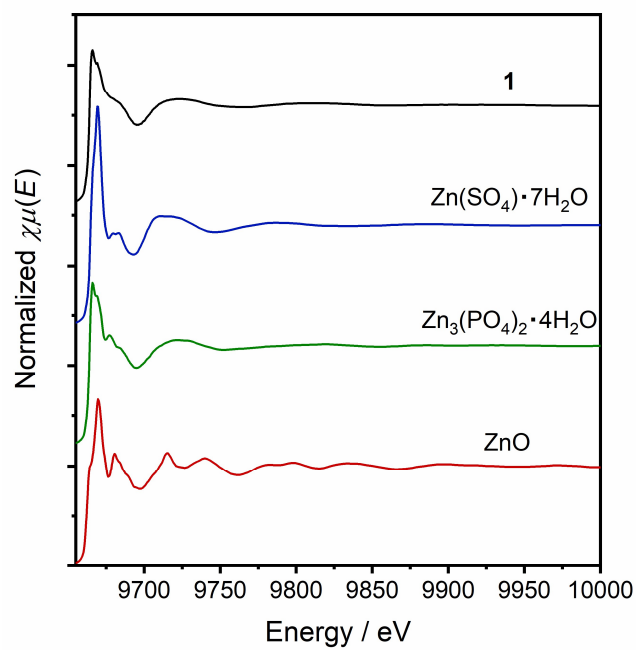

**Fig. S6.** XAFS spectra of Zn *K*-edge of **1** (black) and references with known coordination structures:  $\text{Zn}(\text{SO}_4)\cdot 7\text{H}_2\text{O}$  (blue),  $\text{Zn}_3(\text{PO}_4)_2\cdot 4\text{H}_2\text{O}$  (green) and ZnO (red).

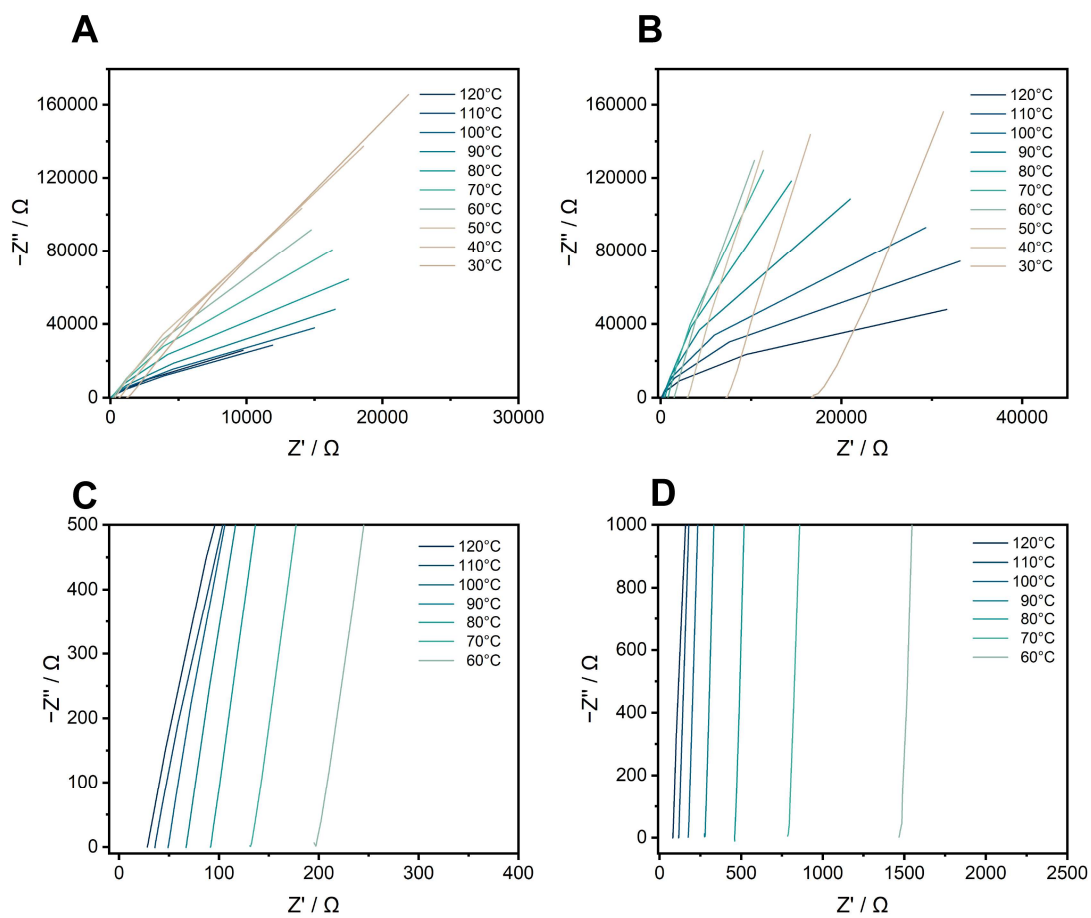

**Fig. S7.** Nyquist plots of (A) **1** and (B) **2** from 1.0 MHz to 0.2 Hz measured at 30-120 °C. The enlarged low resistance regions of (C) **1** and (D) **2** are also shown.

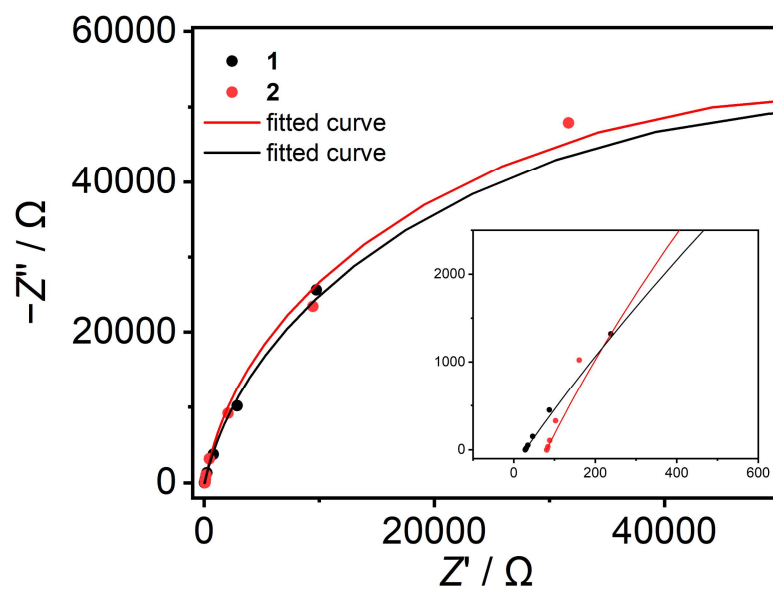

**Fig. S8.** Nyquist plots of **1** (black) and **2** (red) at 120 °C. The solid lines represent the fitted curves obtained by an equivalent circuit model (Fig. S8). Inset showed enlarged plot around low resistance region.

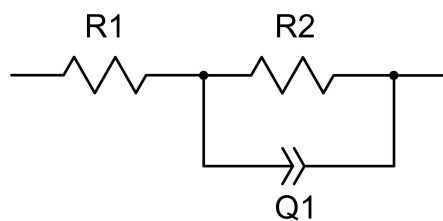

**Fig. S9.** Equivalent circuit for the fitting of impedance measurements. R1, R2 and Q1 represent the bulk resistance of **1** or **2**, resistance and constant phase element of the interface between electrodes and electrolytes, respectively.



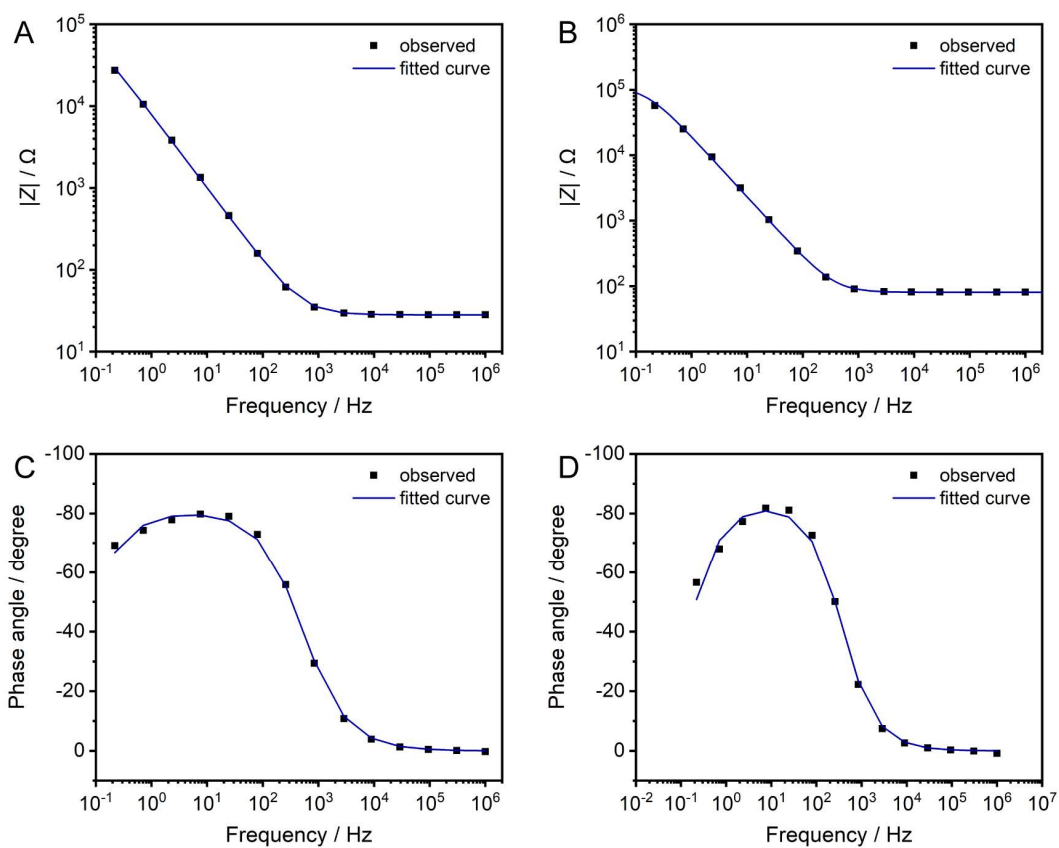

**Fig. S10.** Bode plots for the impedance measurements.  $|Z|$  vs frequency plots for (A) **1** and (B) **2**. Impedance phase angle vs frequency plots for (C) **1** and (D) **2**. The fitted curves are plotted as blue lines by an equivalent circuit model shown in Fig. S8.

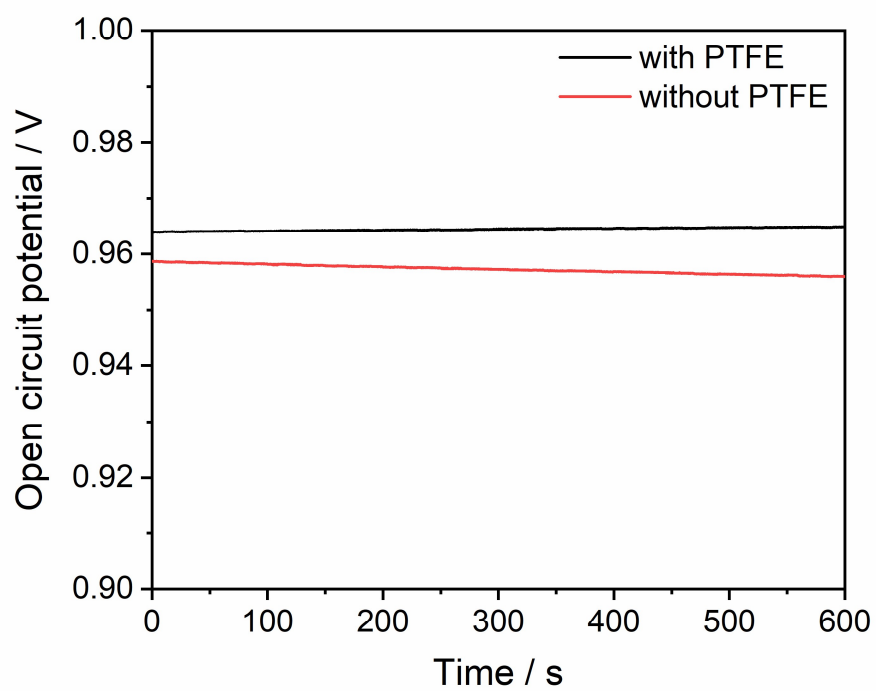

**Fig. S11.** OCV of a H<sub>2</sub>/O<sub>2</sub> fuel cell using **1** as an electrolyte with PTFE (black) or without PTFE (red) at 120 °C without humidification.

**Table S2.** Simulated RMC structure in cif format. This text file can be opened in a visualization software for crystal structures.

|                                |             |             |             |             |     |             |             |             |
|--------------------------------|-------------|-------------|-------------|-------------|-----|-------------|-------------|-------------|
| _chemical_formula_sum          | 'Zn'        |             |             | Zn50        | Zn  | 0.418903645 | 0.691247131 | 0.130989645 |
| _cell_length_a                 | 27.439582   |             |             | Zn51        | Zn  | 0.663588819 | 0.578163264 | 0.816726837 |
| _cell_length_b                 | 27.439582   |             |             | Zn52        | Zn  | 0.519741223 | 0.155637875 | 0.084673672 |
| _cell_length_c                 | 27.439582   |             |             | Zn53        | Zn  | 0.344365307 | 0.394250048 | 0.50761771  |
| _cell_angle_alpha              | 90          |             |             | Zn54        | Zn  | 0.51495158  | 0.184199502 | 0.200164511 |
| _cell_angle_beta               | 90          |             |             | Zn55        | Zn  | 0.362124785 | 0.827338965 | 0.329201797 |
| _cell_angle_gamma              | 90          |             |             | Zn56        | Zn  | 0.632226149 | 0.46966613  | 0.127583494 |
| _cell_volume                   | 20660.10259 |             |             | Zn57        | Zn  | 0.016429585 | 0.047992418 | 0.493414978 |
| _cell_formula_units_Z          | 1           |             |             | Zn58        | Zn  | 0.419336333 | 0.138029369 | 0.96528006  |
| _symmetry_space_group_name_H-M | 'P 1'       |             |             | Zn59        | Zn  | 0.473142574 | 0.036540535 | 0.160593632 |
| _symmetry_Int_Tables_number    | 1           |             |             | Zn60        | Zn  | 0.144356569 | 0.766829483 | 0.919600503 |
| _symmetry_cell_setting         | cubic       |             |             | P1          | P   | 0.598897705 | 0.718065417 | 0.275474427 |
| loop_                          |             |             |             | P2          | P   | 0.863926159 | 0.03963896  | 0.100161646 |
| _symmetry_equiv_pos_site_id    |             |             |             | P3          | P   | 0.310430059 | 0.501810436 | 0.49269793  |
| _symmetry_equiv_pos_as_xyz     |             |             |             | P4          | P   | 0.152251063 | 0.8390352   | 0.836932973 |
| l 'x, y, z'                    |             |             |             | P5          | P   | 0.122441202 | 0.676322547 | 0.548446924 |
| loop_                          |             |             |             | P6          | P   | 0.352023723 | 0.353178004 | 0.441532317 |
| _atom_site_label               |             |             |             | P7          | P   | 0.472649829 | 0.294791474 | 0.687964669 |
| _atom_site_type_symbol         |             |             |             | P8          | P   | 0.767682951 | 0.175264031 | 0.253318309 |
| _atom_site_fract_x             |             |             |             | P9          | P   | 0.077070957 | 0.493312488 | 0.551317845 |
| _atom_site_fract_y             |             |             |             | P10         | P   | 0.011916648 | 0.709755931 | 0.159039711 |
| _atom_site_fract_z             |             |             |             | P11         | P   | 0.364330408 | 0.645114395 | 0.853404402 |
| Zn1                            | Zn          | 0.122144652 | 0.212137494 | 0.742813302 | P12 | P           | 0.319392067 | 0.007161506 |
| Zn2                            | Zn          | 0.727756327 | 0.354130517 | 0.949666021 | P13 | P           | 0.390086375 | 0.36808302  |
| Zn3                            | Zn          | 0.586435851 | 0.281056544 | 0.017586505 | P14 | P           | 0.432951163 | 0.713288156 |
| Zn4                            | Zn          | 0.089533266 | 0.066108149 | 0.664246529 | P15 | P           | 0.892837129 | 0.720149262 |
| Zn5                            | Zn          | 0.364188533 | 0.27584323  | 0.675523167 | P16 | P           | 0.297716174 | 0.019372299 |
| Zn6                            | Zn          | 0.104697688 | 0.533546018 | 0.98704201  | P17 | P           | 0.620143186 | 0.478840861 |
| Zn7                            | Zn          | 0.360537487 | 0.92884936  | 0.483318385 | P18 | P           | 0.423084721 | 0.198428864 |
| Zn8                            | Zn          | 0.826574774 | 0.523406278 | 0.67935078  | P19 | P           | 0.225019237 | 0.259038351 |
| Zn9                            | Zn          | 0.155592688 | 0.90750379  | 0.515445687 | P20 | P           | 0.225554497 | 0.544499797 |
| Zn10                           | Zn          | 0.32621158  | 0.533524162 | 0.901464577 | P21 | P           | 0.894341747 | 0.583339172 |
| Zn11                           | Zn          | 0.187577379 | 0.357107852 | 0.902506243 | P22 | P           | 0.815611238 | 0.566188368 |
| Zn12                           | Zn          | 0.492505749 | 0.302964113 | 0.083862017 | P23 | P           | 0.429830641 | 0.499053226 |
| Zn13                           | Zn          | 0.614019846 | 0.33358989  | 0.92103056  | P24 | P           | 0.932094529 | 0.334135868 |
| Zn14                           | Zn          | 0.843573232 | 0.106746945 | 0.193532762 | P25 | P           | 0.015968302 | 0.074496116 |
| Zn15                           | Zn          | 0.647791101 | 0.074177955 | 0.779657399 | P26 | P           | 0.713327326 | 0.685731256 |
| Zn16                           | Zn          | 0.073088057 | 0.237611842 | 0.865249936 | P27 | P           | 0.274959149 | 0.86747807  |
| Zn17                           | Zn          | 0.678628977 | 0.164926999 | 0.897568355 | P28 | P           | 0.802051309 | 0.002605046 |
| Zn18                           | Zn          | 0.663587885 | 0.21782386  | 0.211157814 | P29 | P           | 0.717687165 | 0.321355948 |
| Zn19                           | Zn          | 0.459352923 | 0.885380548 | 0.220927982 | P30 | P           | 0.214251368 | 0.819121513 |
| Zn20                           | Zn          | 0.308687135 | 0.456712836 | 0.983529223 | P31 | P           | 0.716985617 | 0.615785699 |
| Zn21                           | Zn          | 0.577900215 | 0.225474742 | 0.910022766 | P32 | P           | 0.826506161 | 0.29546065  |
| Zn22                           | Zn          | 0.158563013 | 0.320812389 | 0.062592792 | P33 | P           | 0.672745838 | 0.864682237 |
| Zn23                           | Zn          | 0.402289716 | 0.966182023 | 0.005998519 | P34 | P           | 0.97370852  | 0.740758052 |
| Zn24                           | Zn          | 0.259787537 | 0.940104475 | 0.155705259 | P35 | P           | 0.143007957 | 0.287348734 |
| Zn25                           | Zn          | 0.441182228 | 0.596889595 | 0.777453082 | P36 | P           | 0.918635149 | 0.945366377 |
| Zn26                           | Zn          | 0.113090919 | 0.38115483  | 0.149483993 | P37 | P           | 0.540253998 | 0.313326693 |
| Zn27                           | Zn          | 0.83872315  | 0.686753628 | 0.766754384 | P38 | P           | 0.200038407 | 0.088443984 |
| Zn28                           | Zn          | 0.796629101 | 0.17073991  | 0.695080658 | P39 | P           | 0.3404641   | 0.386208474 |
| Zn29                           | Zn          | 0.208652158 | 0.234774931 | 0.008632305 | P40 | P           | 0.465570273 | 0.111487438 |
| Zn30                           | Zn          | 0.070926791 | 0.904201249 | 0.783457696 | P41 | P           | 0.505910539 | 0.990235476 |
| Zn31                           | Zn          | 0.838150189 | 0.974294087 | 0.546368531 | P42 | P           | 0.229823283 | 0.619840792 |
| Zn32                           | Zn          | 0.92089715  | 0.991524646 | 0.73277231  | P43 | P           | 0.446535936 | 0.628200897 |
| Zn33                           | Zn          | 0.773774894 | 0.254185302 | 0.550201373 | P44 | P           | 0.072451269 | 0.272815052 |
| Zn34                           | Zn          | 0.779025962 | 0.631168574 | 0.673774122 | P45 | P           | 0.901348574 | 0.06701059  |
| Zn35                           | Zn          | 0.407946545 | 0.706472451 | 0.759979395 | P46 | P           | 0.346924468 | 0.882155503 |
| Zn36                           | Zn          | 0.302397946 | 0.760441312 | 0.245718422 | P47 | P           | 0.515350798 | 0.691431789 |
| Zn37                           | Zn          | 0.70738843  | 0.531804312 | 0.009830302 | P48 | P           | 0.308977252 | 0.164452827 |
| Zn38                           | Zn          | 0.37181089  | 0.178818148 | 0.751980923 | P49 | P           | 0.565358716 | 0.637005035 |
| Zn39                           | Zn          | 0.054549032 | 0.223562066 | 0.529257719 | P50 | P           | 0.697730045 | 0.345566066 |
| Zn40                           | Zn          | 0.979636482 | 0.939475151 | 0.520462585 | P51 | P           | 0.930947216 | 0.76366713  |
| Zn41                           | Zn          | 0.505674087 | 0.783082556 | 0.242454701 | P52 | P           | 0.592962432 | 0.964812097 |
| Zn42                           | Zn          | 0.972523643 | 0.185592472 | 0.904457858 | P53 | P           | 0.663522117 | 0.022566571 |
| Zn43                           | Zn          | 0.250524181 | 0.824766977 | 0.893685813 | P54 | P           | 0.179106585 | 0.189801604 |
| Zn44                           | Zn          | 0.760728995 | 0.244212948 | 0.872603114 | P55 | P           | 0.042410855 | 0.91632918  |
| Zn45                           | Zn          | 0.41826996  | 0.136082203 | 0.531633674 | P56 | P           | 0.717609203 | 0.107184059 |
| Zn46                           | Zn          | 0.727935426 | 0.017030772 | 0.570508233 | P57 | P           | 0.785219069 | 0.851920138 |
| Zn47                           | Zn          | 0.036917795 | 0.795826908 | 0.068447279 | P58 | P           | 0.143889572 | 0.332537105 |
| Zn48                           | Zn          | 0.776167482 | 0.969537801 | 0.135636014 | P59 | P           | 0.020146875 | 0.176409888 |
| Zn49                           | Zn          | 0.254645419 | 0.951292055 | 0.333169623 | P60 | P           | 0.387428861 | 0.532134792 |

|      |   |             |             |             |      |   |             |             |             |
|------|---|-------------|-------------|-------------|------|---|-------------|-------------|-------------|
| P61  | P | 0.301143661 | 0.687337745 | 0.520199193 | P136 | P | 0.305819086 | 0.171403124 | 0.999143897 |
| P62  | P | 0.428039934 | 0.992100981 | 0.737482484 | P137 | P | 0.719374379 | 0.308188957 | 0.158247548 |
| P63  | P | 0.37450999  | 0.167046965 | 0.640815031 | P138 | P | 0.110125193 | 0.590406462 | 0.290221536 |
| P64  | P | 0.289290325 | 0.092447548 | 0.757370998 | P139 | P | 0.451614945 | 0.430432728 | 0.565440444 |
| P65  | P | 0.583193201 | 0.24050875  | 0.126498494 | P140 | P | 0.749552812 | 0.272734858 | 0.659099273 |
| P66  | P | 0.242816013 | 0.964073847 | 0.455088954 | P141 | P | 0.683064199 | 0.710270743 | 0.583931281 |
| P67  | P | 0.741533407 | 0.88421046  | 0.207899913 | P142 | P | 0.237145169 | 0.368480021 | 0.545499238 |
| P68  | P | 0.856658998 | 0.444954661 | 0.899611071 | P143 | P | 0.112198883 | 0.45185598  | 0.895318415 |
| P69  | P | 0.410742681 | 0.130554325 | 0.192581195 | P144 | P | 0.896694997 | 0.110402748 | 0.690427497 |
| P70  | P | 0.09512558  | 0.87429773  | 0.672054396 | P145 | P | 0.712725244 | 0.779161225 | 0.078137198 |
| P71  | P | 0.471094094 | 0.81252918  | 0.348522146 | P146 | P | 0.10815314  | 0.284369532 | 0.963730187 |
| P72  | P | 0.362555464 | 0.706238004 | 0.325279265 | P147 | P | 0.712798369 | 0.04925697  | 0.917801713 |
| P73  | P | 0.599453335 | 0.566437226 | 0.201009211 | P148 | P | 0.758620742 | 0.520617433 | 0.779745512 |
| P74  | P | 0.236495182 | 0.671469581 | 0.232667378 | P149 | P | 0.661036332 | 0.291616813 | 0.530905137 |
| P75  | P | 0.065767994 | 0.459275487 | 0.222441749 | P150 | P | 0.973404493 | 0.866674444 | 0.168862013 |
| P76  | P | 0.526489846 | 0.392213814 | 0.428878401 | P151 | P | 0.018650037 | 0.643700561 | 0.439449335 |
| P77  | P | 0.816360498 | 0.742924925 | 0.666225887 | P152 | P | 0.964381193 | 0.205691279 | 0.017594404 |
| P78  | P | 0.533851959 | 0.403045124 | 0.155946452 | P153 | P | 0.949364273 | 0.576485521 | 0.278525303 |
| P79  | P | 0.148386916 | 0.122535905 | 0.98893655  | P154 | P | 0.307936727 | 0.273616488 | 0.771160501 |
| P80  | P | 0.538672916 | 0.376702439 | 0.994225795 | P155 | P | 0.451370714 | 0.859489134 | 0.526138871 |
| P81  | P | 0.679543972 | 0.252833553 | 0.965989267 | P156 | P | 0.576703812 | 0.864964157 | 0.199374504 |
| P82  | P | 0.320223452 | 0.93288911  | 0.597146177 | P157 | P | 0.403509083 | 0.786686    | 0.196803021 |
| P83  | P | 0.941491436 | 0.245488725 | 0.564856587 | P158 | P | 0.181642544 | 0.471499435 | 0.372412226 |
| P84  | P | 0.300524018 | 0.851784389 | 0.10028991  | P159 | P | 0.465787011 | 0.768607728 | 0.83527749  |
| P85  | P | 0.185781361 | 0.102067575 | 0.136154019 | P160 | P | 0.265735623 | 0.437453865 | 0.870562364 |
| P86  | P | 0.412468823 | 0.778956444 | 0.652894596 | P161 | P | 0.810987682 | 0.587883118 | 0.978157905 |
| P87  | P | 0.984564499 | 0.066089791 | 0.939032097 | P162 | P | 0.769046145 | 0.915117176 | 0.612066129 |
| P88  | P | 0.743311841 | 0.431551255 | 0.648722582 | P163 | P | 0.132247353 | 0.588156457 | 0.098019006 |
| P89  | P | 0.974602721 | 0.303767771 | 0.874848211 | P164 | P | 0.508364326 | 0.923819872 | 0.95648605  |
| P90  | P | 0.957249886 | 0.87461525  | 0.761489994 | P165 | P | 0.594694294 | 0.539261679 | 0.039395682 |
| P91  | P | 0.901445893 | 0.207685152 | 0.17497676  | P166 | P | 0.680590093 | 0.027450746 | 0.276711582 |
| P92  | P | 0.160168259 | 0.608331541 | 0.849639423 | P167 | P | 0.754551886 | 0.129239295 | 0.596805095 |
| P93  | P | 0.673454143 | 0.573659955 | 0.653911718 | P168 | P | 0.314289947 | 0.644292495 | 0.086533923 |
| P94  | P | 0.375582932 | 0.944130259 | 0.359071894 | P169 | P | 0.448668219 | 0.250354759 | 0.516826311 |
| P95  | P | 0.430880484 | 0.387856578 | 0.286158887 | P170 | P | 0.794073092 | 0.365515802 | 0.504818951 |
| P96  | P | 0.664764327 | 0.495993782 | 0.904459114 | P171 | P | 0.836742455 | 0.471755973 | 0.307398454 |
| P97  | P | 0.202484349 | 0.260700292 | 0.656551932 | P172 | P | 0.993045618 | 0.969513689 | 0.414606669 |
| P98  | P | 0.150039992 | 0.768553658 | 0.128555102 | P173 | P | 0.685946182 | 0.953414709 | 0.041543076 |
| P99  | P | 0.722554464 | 0.671273578 | 0.774694518 | P174 | P | 0.611944684 | 0.006225254 | 0.526697403 |
| P100 | P | 0.968052484 | 0.60016442  | 0.605259794 | P175 | P | 0.387608061 | 0.03919169  | 0.907575972 |
| P101 | P | 0.14861214  | 0.94251721  | 0.176178932 | P176 | P | 0.386726772 | 0.27763485  | 0.11597102  |
| P102 | P | 0.459621732 | 0.930698907 | 0.10585978  | P177 | P | 0.185247639 | 0.855865695 | 0.998362494 |
| P103 | P | 0.29816642  | 0.864760138 | 0.783341303 | P178 | P | 0.154840996 | 0.026605293 | 0.320999723 |
| P104 | P | 0.083923666 | 0.71275666  | 0.993756136 | P179 | P | 0.903835179 | 0.879882911 | 0.322905007 |
| P105 | P | 0.717280681 | 0.468351124 | 0.205938724 | P180 | P | 0.082788753 | 0.333329722 | 0.55297723  |
| P106 | P | 0.290176354 | 0.713417391 | 0.733144686 | O1   | O | 0.343185197 | 0.299016149 | 0.740362079 |
| P107 | P | 0.735826366 | 0.514812682 | 0.427796222 | O2   | O | 0.809207259 | 0.469082928 | 0.922522323 |
| P108 | P | 0.896321599 | 0.434437113 | 0.612442798 | O3   | O | 0.244287738 | 0.392779783 | 0.891495621 |
| P109 | P | 0.993353884 | 0.531185697 | 0.049579719 | O4   | O | 0.133594371 | 0.003562767 | 0.370744416 |
| P110 | P | 0.873097074 | 0.249589306 | 0.76243675  | O5   | O | 0.121024519 | 0.812739247 | 0.876796033 |
| P111 | P | 0.312815629 | 0.825258267 | 0.43782814  | O6   | O | 0.664038752 | 0.9989247   | 0.550837531 |
| P112 | P | 0.075092808 | 0.987389942 | 0.570830074 | O7   | O | 0.253905929 | 0.291051611 | 0.753809768 |
| P113 | P | 0.482839732 | 0.061989718 | 0.02694182  | O8   | O | 0.354755608 | 0.012206544 | 0.221099337 |
| P114 | P | 0.499332715 | 0.218049521 | 0.994398584 | O9   | O | 0.730834352 | 0.052916578 | 0.285378075 |
| P115 | P | 0.260495557 | 0.350791722 | 0.015952929 | O10  | O | 0.507922448 | 0.270453524 | 0.02577301  |
| P116 | P | 0.160510323 | 0.338765938 | 0.249936093 | O11  | O | 0.472962905 | 0.382452802 | 0.429447669 |
| P117 | P | 0.072220376 | 0.183170225 | 0.635176217 | O12  | O | 0.705544173 | 0.222720262 | 0.926376893 |
| P118 | P | 0.430699211 | 0.574924873 | 0.160409083 | O13  | O | 0.901992274 | 0.548174254 | 0.788953854 |
| P119 | P | 0.57186856  | 0.088450913 | 0.161050197 | O14  | O | 0.54804586  | 0.385813936 | 0.206919578 |
| P120 | P | 0.243689597 | 0.718967584 | 0.933974333 | O15  | O | 0.266026523 | 0.391252593 | 0.980744239 |
| P121 | P | 0.029069827 | 0.018478416 | 0.760856781 | O16  | O | 0.307283984 | 0.313983317 | 0.005797591 |
| P122 | P | 0.116300241 | 0.425573705 | 0.047943988 | O17  | O | 0.711200916 | 0.143162028 | 0.380546211 |
| P123 | P | 0.579747964 | 0.121917099 | 0.854309304 | O18  | O | 0.174514277 | 0.358027695 | 0.744681213 |
| P124 | P | 0.016651465 | 0.583586618 | 0.906436474 | O19  | O | 0.845214269 | 0.741464162 | 0.716835658 |
| P125 | P | 0.714042785 | 0.422486532 | 0.044538906 | O20  | O | 0.904104922 | 0.003758914 | 0.104485848 |
| P126 | P | 0.747255665 | 0.959150618 | 0.467044842 | O21  | O | 0.02779626  | 0.838620315 | 0.175236915 |
| P127 | P | 0.532409955 | 0.727913913 | 0.137432884 | O22  | O | 0.069722137 | 0.665924077 | 0.54448215  |
| P128 | P | 0.056000531 | 0.853535627 | 0.497180191 | O23  | O | 0.433888256 | 0.494789965 | 0.992329677 |
| P129 | P | 0.836409796 | 0.224356131 | 0.448169251 | O24  | O | 0.418750396 | 0.726875997 | 0.199248192 |
| P130 | P | 0.073912125 | 0.13660453  | 0.450249254 | O25  | O | 0.51371272  | 0.087599381 | 0.410506557 |
| P131 | P | 0.841666608 | 0.888500203 | 0.076095614 | O26  | O | 0.018328919 | 0.653561067 | 0.142445069 |
| P132 | P | 0.437448527 | 0.013739803 | 0.53477621  | O27  | O | 0.802971139 | 0.435628008 | 0.337704483 |
| P133 | P | 0.829381307 | 0.004343769 | 0.245135627 | O28  | O | 0.025007465 | 0.048678914 | 0.982577862 |
| P134 | P | 0.851526392 | 0.156588904 | 0.885794704 | O29  | O | 0.316290313 | 0.817297278 | 0.378864645 |
| P135 | P | 0.71280314  | 0.181523924 | 0.785556507 | O30  | O | 0.027765607 | 0.58948436  | 0.46744468  |

|      |   |             |             |             |      |   |             |             |             |
|------|---|-------------|-------------|-------------|------|---|-------------|-------------|-------------|
| O31  | O | 0.257388683 | 0.517828287 | 0.507857782 | O106 | O | 0.042329498 | 0.721486239 | 0.204234884 |
| O32  | O | 0.08644402  | 0.556957824 | 0.334905638 | O107 | O | 0.316057811 | 0.217438902 | 0.766404535 |
| O33  | O | 0.174561637 | 0.196193879 | 0.781667367 | O108 | O | 0.729594614 | 0.036822056 | 0.867173882 |
| O34  | O | 0.186229506 | 0.085338315 | 0.000718255 | O109 | O | 0.028369789 | 0.92383594  | 0.400683418 |
| O35  | O | 0.361784012 | 0.222696351 | 0.631233022 | O110 | O | 0.560844956 | 0.597310331 | 0.175840505 |
| O36  | O | 0.244347633 | 0.590369513 | 0.34777619  | O111 | O | 0.773775114 | 0.081871634 | 0.417099159 |
| O37  | O | 0.701955121 | 0.662522813 | 0.55826702  | O112 | O | 0.556832548 | 0.145207845 | 0.8125314   |
| O38  | O | 0.164665787 | 0.510323635 | 0.409760358 | O113 | O | 0.414521979 | 0.327950943 | 0.963180268 |
| O39  | O | 0.730228206 | 0.298856156 | 0.831138988 | O114 | O | 0.470871764 | 0.589894987 | 0.628063702 |
| O40  | O | 0.569152252 | 0.49645915  | 0.336466849 | O115 | O | 0.2065162   | 0.262894794 | 0.075517407 |
| O41  | O | 0.656791784 | 0.524591677 | 0.326856662 | O116 | O | 0.464698998 | 0.296793026 | 0.540602131 |
| O42  | O | 0.903913113 | 0.181578063 | 0.903932674 | O117 | O | 0.436253701 | 0.819271832 | 0.231173696 |
| O43  | O | 0.4769239   | 0.204238542 | 0.830578689 | O118 | O | 0.122987012 | 0.901309668 | 0.631723417 |
| O44  | O | 0.029766042 | 0.279862824 | 0.086895675 | O119 | O | 0.053796299 | 0.759630063 | 0.009851377 |
| O45  | O | 0.595037292 | 0.593835914 | 0.781860635 | O120 | O | 0.945390337 | 0.263619993 | 0.018824277 |
| O46  | O | 0.6264674   | 0.230258808 | 0.973118513 | O121 | O | 0.846974735 | 0.54164253  | 0.993658906 |
| O47  | O | 0.890874018 | 0.430245214 | 0.943819774 | O122 | O | 0.361978318 | 0.153605807 | 0.497824148 |
| O48  | O | 0.06562858  | 0.312263235 | 0.982331783 | O123 | O | 0.344360534 | 0.678548249 | 0.485771344 |
| O49  | O | 0.379441437 | 0.306115426 | 0.420964473 | O124 | O | 0.888818405 | 0.780600559 | 0.98986011  |
| O50  | O | 0.634561034 | 0.926396432 | 0.789777329 | O125 | O | 0.574987412 | 0.332599505 | 0.974792608 |
| O51  | O | 0.12140336  | 0.575901218 | 0.821379491 | O126 | O | 0.520050333 | 0.287985146 | 0.65610239  |
| O52  | O | 0.64276052  | 0.991708835 | 0.023892591 | O127 | O | 0.075292303 | 0.167289232 | 0.766858879 |
| O53  | O | 0.718389408 | 0.974674077 | 0.088534914 | O128 | O | 0.711339289 | 0.838285365 | 0.201320769 |
| O54  | O | 0.44061609  | 0.024452047 | 0.025482684 | O129 | O | 0.068006917 | 0.821510588 | 0.543471558 |
| O55  | O | 0.277142393 | 0.762782881 | 0.920102837 | O130 | O | 0.445359301 | 0.181685796 | 0.19324778  |
| O56  | O | 0.282591452 | 0.075850429 | 0.244179246 | O131 | O | 0.717190993 | 0.827014353 | 0.888968895 |
| O57  | O | 0.325284875 | 0.329367229 | 0.658219957 | O132 | O | 0.643044724 | 0.974102964 | 0.686717378 |
| O58  | O | 0.15285139  | 0.473241539 | 0.323176758 | O133 | O | 0.903646505 | 0.670626917 | 0.887767597 |
| O59  | O | 0.13486298  | 0.722104954 | 0.508937895 | O134 | O | 0.994345922 | 0.197224473 | 0.970635235 |
| O60  | O | 0.461681833 | 0.918366972 | 0.983117825 | O135 | O | 0.059426243 | 0.900698756 | 0.976991422 |
| O61  | O | 0.496652567 | 0.69251958  | 0.117037129 | O136 | O | 0.568447909 | 0.283290017 | 0.090644685 |
| O62  | O | 0.723813515 | 0.596506045 | 0.656222588 | O137 | O | 0.970378937 | 0.626229693 | 0.248457463 |
| O63  | O | 0.522091454 | 0.979574968 | 0.95753221  | O138 | O | 0.887451674 | 0.907292201 | 0.039676474 |
| O64  | O | 0.344998564 | 0.908113471 | 0.551140657 | O139 | O | 0.153178478 | 0.254594905 | 0.437861597 |
| O65  | O | 0.478024354 | 0.242942558 | 0.468847518 | O140 | O | 0.155149596 | 0.419190222 | 0.917133454 |
| O66  | O | 0.873985669 | 0.167983504 | 0.197819099 | O141 | O | 0.773536507 | 0.528723969 | 0.563518227 |
| O67  | O | 0.335519144 | 0.662360415 | 0.307594365 | O142 | O | 0.948445956 | 0.924437237 | 0.579782967 |
| O68  | O | 0.673936657 | 0.054340884 | 0.715094129 | O143 | O | 0.841063177 | 0.401170012 | 0.869844449 |
| O69  | O | 0.817919318 | 0.632362633 | 0.016393976 | O144 | O | 0.163052132 | 0.572505754 | 0.275651856 |
| O70  | O | 0.695633559 | 0.232292001 | 0.763715523 | O145 | O | 0.560443607 | 0.296134306 | 0.882748347 |
| O71  | O | 0.320933322 | 0.707504979 | 0.571128676 | O146 | O | 0.815865025 | 0.018827842 | 0.11393951  |
| O72  | O | 0.340972888 | 0.755202531 | 0.303744779 | O147 | O | 0.481103839 | 0.005220877 | 0.500566942 |
| O73  | O | 0.660665011 | 0.910531053 | 0.060953698 | O148 | O | 0.427334475 | 0.07023492  | 0.537203888 |
| O74  | O | 0.403069977 | 0.645462502 | 0.896250119 | O149 | O | 0.674910785 | 0.30455639  | 0.947438971 |
| O75  | O | 0.677782181 | 0.353154516 | 0.149259797 | O150 | O | 0.877523045 | 0.906539383 | 0.3695228   |
| O76  | O | 0.873945521 | 0.083218489 | 0.13647782  | O151 | O | 0.794509244 | 0.887143815 | 0.05081134  |
| O77  | O | 0.703517433 | 0.367769109 | 0.34680332  | O152 | O | 0.895443482 | 0.710125565 | 0.803411839 |
| O78  | O | 0.742017252 | 0.468422842 | 0.035351315 | O153 | O | 0.445700013 | 0.755788657 | 0.61121044  |
| O79  | O | 0.353233341 | 0.14427941  | 0.176434525 | O154 | O | 0.932982645 | 0.155467119 | 0.695673694 |
| O80  | O | 0.507478388 | 0.78776371  | 0.386529018 | O155 | O | 0.93266319  | 0.76073056  | 0.881566751 |
| O81  | O | 0.406095054 | 0.802115325 | 0.141365918 | O156 | O | 0.299510826 | 0.589287    | 0.090817376 |
| O82  | O | 0.695708819 | 0.820896607 | 0.038495118 | O157 | O | 0.135108051 | 0.689068069 | 0.602431461 |
| O83  | O | 0.668490136 | 0.698593403 | 0.448610122 | O158 | O | 0.577465932 | 0.426999949 | 0.130882149 |
| O84  | O | 0.380600649 | 0.891580575 | 0.885433205 | O159 | O | 0.736861554 | 0.484580171 | 0.375634342 |
| O85  | O | 0.040597606 | 0.047619428 | 0.7082302   | O160 | O | 0.876444007 | 0.322609207 | 0.958832091 |
| O86  | O | 0.13858582  | 0.362642843 | 0.293910202 | O161 | O | 0.272536493 | 0.675981283 | 0.101210928 |
| O87  | O | 0.294273902 | 0.042536754 | 0.72527584  | O162 | O | 0.389201131 | 0.894856465 | 0.34195687  |
| O88  | O | 0.15210976  | 0.661701716 | 0.830167009 | O163 | O | 0.724741529 | 0.183655828 | 0.845593008 |
| O89  | O | 0.063567724 | 0.410244127 | 0.185548117 | O164 | O | 0.890547427 | 0.095465075 | 0.630697664 |
| O90  | O | 0.965979705 | 0.807446199 | 0.039864507 | O165 | O | 0.316478073 | 0.287585492 | 0.827388602 |
| O91  | O | 0.877985959 | 0.984443988 | 0.231196106 | O166 | O | 0.145864328 | 0.064447711 | 0.123310542 |
| O92  | O | 0.094146889 | 0.561162182 | 0.123881578 | O167 | O | 0.111148406 | 0.458843953 | 0.589245713 |
| O93  | O | 0.672024156 | 0.982737818 | 0.31775263  | O168 | O | 0.641556174 | 0.52211219  | 0.017210288 |
| O94  | O | 0.951362671 | 0.505619281 | 0.018299918 | O169 | O | 0.78057418  | 0.273075795 | 0.61624581  |
| O95  | O | 0.51586566  | 0.74589796  | 0.546375863 | O170 | O | 0.342553686 | 0.114431605 | 0.758202489 |
| O96  | O | 0.8531717   | 0.544547964 | 0.612957184 | O171 | O | 0.027162085 | 0.102702029 | 0.452398307 |
| O97  | O | 0.566422293 | 0.283571022 | 0.787339724 | O172 | O | 0.976812019 | 0.015281801 | 0.770673172 |
| O98  | O | 0.12445202  | 0.433979785 | 0.100815063 | O173 | O | 0.755847048 | 0.040760092 | 0.955969769 |
| O99  | O | 0.17189153  | 0.544243846 | 0.961938023 | O174 | O | 0.547457153 | 0.118990935 | 0.198967379 |
| O100 | O | 0.457773491 | 0.818503396 | 0.810480346 | O175 | O | 0.95831908  | 0.881158672 | 0.326757883 |
| O101 | O | 0.422549278 | 0.813239835 | 0.371148191 | O176 | O | 0.404148333 | 0.994365831 | 0.933817753 |
| O102 | O | 0.929583039 | 0.831960476 | 0.175837035 | O177 | O | 0.039584493 | 0.515784099 | 0.028072366 |
| O103 | O | 0.223406218 | 0.681767812 | 0.287218237 | O178 | O | 0.342424155 | 0.548531973 | 0.500083035 |
| O104 | O | 0.744108387 | 0.803786719 | 0.116994905 | O179 | O | 0.212616318 | 0.836381138 | 0.6333891   |
| O105 | O | 0.14914927  | 0.383436125 | 0.027745407 | O180 | O | 0.110686122 | 0.792388726 | 0.096963182 |

|      |   |             |             |             |      |   |              |             |             |
|------|---|-------------|-------------|-------------|------|---|--------------|-------------|-------------|
| O181 | O | 0.401706506 | 0.164119676 | 0.692886564 | O256 | O | 0.076222357  | 0.58335519  | 0.242382755 |
| O182 | O | 0.894300999 | 0.470534539 | 0.329973588 | O257 | O | 0.305778188  | 0.41194618  | 0.704008235 |
| O183 | O | 0.877820384 | 0.22083572  | 0.123321483 | O258 | O | 0.2533867    | 0.546025516 | 0.924784821 |
| O184 | O | 0.201651778 | 0.319515461 | 0.540951349 | O259 | O | 0.750318885  | 0.449824506 | 0.161982879 |
| O185 | O | 0.785549091 | 0.139292999 | 0.217522818 | O260 | O | 0.35463288   | 0.0462628   | 0.092880767 |
| O186 | O | 0.139513884 | 0.28544221  | 0.244641535 | O261 | O | 0.051242889  | 0.275843801 | 0.181528616 |
| O187 | O | 0.194363184 | 0.946838257 | 0.141889394 | O262 | O | 0.693571671  | 0.551235891 | 0.431147935 |
| O188 | O | 0.548238396 | 0.370252638 | 0.827306329 | O263 | O | 0.08797137   | 0.005194056 | 0.622363364 |
| O189 | O | 0.015038629 | 0.189232075 | 0.631607975 | O264 | O | 0.990535898  | 0.131713487 | 0.793530957 |
| O190 | O | 0.86431206  | 0.021645058 | 0.499953393 | O265 | O | 0.126803525  | 0.743322135 | 0.170695001 |
| O191 | O | 0.475156668 | 0.34461898  | 0.719380741 | O266 | O | 0.5496661858 | 0.525416211 | 0.999507525 |
| O192 | O | 0.167785606 | 0.13230915  | 0.853760166 | O267 | O | 0.755831311  | 0.085365294 | 0.567222327 |
| O193 | O | 0.496258675 | 0.012299554 | 0.316303116 | O268 | O | 0.988718504  | 0.589244032 | 0.045604984 |
| O194 | O | 0.767754077 | 0.329313838 | 0.297603919 | O269 | O | 0.410557686  | 0.106768547 | 0.239989185 |
| O195 | O | 0.226057937 | 0.473001528 | 0.848666589 | O270 | O | 0.718938346  | 0.269588101 | 0.347480891 |
| O196 | O | 0.394062137 | 0.641638836 | 0.803891939 | O271 | O | 0.438169248  | 0.603867653 | 0.711450478 |
| O197 | O | 0.331363499 | 0.602987925 | 0.861774998 | O272 | O | 0.255322594  | 0.721977669 | 0.783564323 |
| O198 | O | 0.141036593 | 0.222904744 | 0.860348064 | O273 | O | 0.212503796  | 0.316946159 | 0.656243488 |
| O199 | O | 0.77876925  | 0.158400376 | 0.305324686 | O274 | O | 0.77163901   | 0.699590512 | 0.790852309 |
| O200 | O | 0.608489939 | 0.499556171 | 0.924146252 | O275 | O | 0.229803089  | 0.31314424  | 0.156573001 |
| O201 | O | 0.63490251  | 0.543498478 | 0.156861143 | O276 | O | 0.34394016   | 0.839561862 | 0.759367848 |
| O202 | O | 0.260448181 | 0.817662281 | 0.4496852   | O277 | O | 0.576263922  | 0.677204381 | 0.247731355 |
| O203 | O | 0.762903152 | 0.361540243 | 0.456108055 | O278 | O | 0.32941809   | 0.460936952 | 0.5339921   |
| O204 | O | 0.06122247  | 0.406435827 | 0.042786559 | O279 | O | 0.293296416  | 0.174925517 | 0.554354365 |
| O205 | O | 0.127282315 | 0.580590687 | 0.036940874 | O280 | O | 0.789503885  | 0.978043779 | 0.213574022 |
| O206 | O | 0.478572808 | 0.409692541 | 0.308687634 | O281 | O | 0.103855486  | 0.915305474 | 0.150119467 |
| O207 | O | 0.507542819 | 0.924782284 | 0.077140088 | O282 | O | 0.174279183  | 0.849100197 | 0.542928964 |
| O208 | O | 0.718007844 | 0.752098055 | 0.570220459 | O283 | O | 0.030474585  | 0.299801077 | 0.862927577 |
| O209 | O | 0.94127969  | 0.853733927 | 0.706778817 | O284 | O | 0.813682573  | 0.036607637 | 0.785115011 |
| O210 | O | 0.75131221  | 0.663645443 | 0.455121716 | O285 | O | 0.969313038  | 0.353707176 | 0.911002869 |
| O211 | O | 0.724593353 | 0.282109388 | 0.111832301 | O286 | O | 0.646968512  | 0.733089701 | 0.251921302 |
| O212 | O | 0.784394116 | 0.554287015 | 0.820466744 | O287 | O | 0.702425625  | 0.614677775 | 0.155254723 |
| O213 | O | 0.931268514 | 0.067362711 | 0.965897142 | O288 | O | 0.57784303   | 0.658021507 | 0.717878383 |
| O214 | O | 0.485240982 | 0.932557057 | 0.263520554 | O289 | O | 0.321853078  | 0.852372251 | 0.04614811  |
| O215 | O | 0.78157     | 0.177187666 | 0.568598712 | O290 | O | 0.694097449  | 0.105893384 | 0.921830046 |
| O216 | O | 0.551364585 | 0.374350979 | 0.3839212   | O291 | O | 0.592197418  | 0.969783426 | 0.864762851 |
| O217 | O | 0.133391244 | 0.996252456 | 0.191120424 | O292 | O | 0.719506642  | 0.911957599 | 0.252935987 |
| O218 | O | 0.467577286 | 0.544951408 | 0.186547671 | O293 | O | 0.381019398  | 0.084814467 | 0.939079573 |
| O219 | O | 0.099492527 | 0.365867786 | 0.803007992 | O294 | O | 0.958834982  | 0.590425229 | 0.926141617 |
| O220 | O | 0.356545585 | 0.831890988 | 0.951765636 | O295 | O | 0.241474315  | 0.496192268 | 0.002007619 |
| O221 | O | 0.578163916 | 0.90607885  | 0.159080725 | O296 | O | 0.812952545  | 0.878390773 | 0.601187826 |
| O222 | O | 0.542435998 | 0.76990031  | 0.093452828 | O297 | O | 0.075829899  | 0.544824351 | 0.566397536 |
| O223 | O | 0.986171152 | 0.021069364 | 0.89678513  | O298 | O | 0.552463649  | 0.037684014 | 0.158432112 |
| O224 | O | 0.366245863 | 0.536867719 | 0.05093366  | O299 | O | 0.589080761  | 0.507524515 | 0.089104056 |
| O225 | O | 0.322464743 | 0.952948283 | 0.358274225 | O300 | O | 0.424556897  | 0.707955914 | 0.065282871 |
| O226 | O | 0.60757336  | 0.69864993  | 0.330656347 | O301 | O | 0.612884523  | 0.996853195 | 0.466255084 |
| O227 | O | 0.760373911 | 0.567920794 | 0.977297573 | O302 | O | 0.210219111  | 0.590375829 | 0.838236134 |
| O228 | O | 0.474482522 | 0.507561976 | 0.879271192 | O303 | O | 0.264498555  | 0.374554312 | 0.071682406 |
| O229 | O | 0.896837642 | 0.227117941 | 0.447118786 | O304 | O | 0.252723145  | 0.232303494 | 0.655104404 |
| O230 | O | 0.457994999 | 0.895118423 | 0.146234276 | O305 | O | 0.126156157  | 0.878879428 | 0.812516519 |
| O231 | O | 0.33733682  | 0.695133534 | 0.856847072 | O306 | O | 0.563887761  | 0.111953241 | 0.110144662 |
| O232 | O | 0.716124527 | 0.942502385 | 0.998674802 | O307 | O | 0.482368115  | 0.018949583 | 0.224647734 |
| O233 | O | 0.25693612  | 0.86506901  | 0.743405277 | O308 | O | 0.958799451  | 0.252950963 | 0.904033914 |
| O234 | O | 0.684111311 | 0.703050307 | 0.639387912 | O309 | O | 0.824745093  | 0.602455127 | 0.921967645 |
| O235 | O | 0.703740342 | 0.436563163 | 0.611413442 | O310 | O | 0.974669902  | 0.768844418 | 0.372165812 |
| O236 | O | 0.852363609 | 0.83529455  | 0.094945959 | O311 | O | 0.529011431  | 0.036239138 | 0.031274944 |
| O237 | O | 0.345621985 | 0.91085278  | 0.648055843 | O312 | O | 0.50682152   | 0.395189386 | 0.953722751 |
| O238 | O | 0.575936965 | 0.676457873 | 0.814437524 | O313 | O | 0.99879711   | 0.119160773 | 0.91275292  |
| O239 | O | 0.840658424 | 0.736438175 | 0.882149587 | O314 | O | 0.217321885  | 0.336478643 | 0.258815044 |
| O240 | O | 0.879657407 | 0.556596944 | 0.70249819  | O315 | O | 0.506090791  | 0.620473831 | 0.772771548 |
| O241 | O | 0.408147256 | 0.14384955  | 0.598603715 | O316 | O | 0.52629001   | 0.852961108 | 0.211716169 |
| O242 | O | 0.661011523 | 0.864415225 | 0.954569176 | O317 | O | 0.835211293  | 0.457808181 | 0.25128769  |
| O243 | O | 0.528744837 | 0.658474103 | 0.579380157 | O318 | O | 0.766314694  | 0.765254354 | 0.67493705  |
| O244 | O | 0.395083059 | 0.646805107 | 0.645030474 | O319 | O | 0.016445959  | 0.62008719  | 0.619565179 |
| O245 | O | 0.463330802 | 0.031439628 | 0.744702547 | O320 | O | 0.932049862  | 0.310303833 | 0.381131536 |
| O246 | O | 0.095533688 | 0.719712837 | 0.938255733 | O321 | O | 0.425273729  | 0.89877221  | 0.500278022 |
| O247 | O | 0.136731741 | 0.317185594 | 0.927021144 | O322 | O | 0.503464377  | 0.359810271 | 0.037389512 |
| O248 | O | 0.503392515 | 0.909762068 | 0.903766382 | O323 | O | 0.70942284   | 0.915876239 | 0.478543708 |
| O249 | O | 0.624058453 | 0.049649519 | 0.638067218 | O324 | O | 0.871127741  | 0.463808759 | 0.655334926 |
| O250 | O | 0.426231058 | 0.164163075 | 0.902355997 | O325 | O | 0.36268737   | 0.277346636 | 0.164399626 |
| O251 | O | 0.141227141 | 0.267697273 | 0.012329362 | O326 | O | 0.008076822  | 0.877101633 | 0.503302249 |
| O252 | O | 0.433746407 | 0.447199199 | 0.81886157  | O327 | O | 0.426841422  | 0.294951692 | 0.654530469 |
| O253 | O | 0.129140836 | 0.643713866 | 0.114140746 | O328 | O | 0.276516554  | 0.230405065 | 0.139360722 |
| O254 | O | 0.932034586 | 0.841943594 | 0.803500461 | O329 | O | 0.019837875  | 0.012022575 | 0.435180311 |
| O255 | O | 0.37658929  | 0.01093535  | 0.709220023 | O330 | O | 0.880568398  | 0.482903433 | 0.869898889 |

|      |   |             |             |             |      |   |             |             |             |
|------|---|-------------|-------------|-------------|------|---|-------------|-------------|-------------|
| O331 | O | 0.4183205   | 0.699088943 | 0.31336471  | O406 | O | 0.738719557 | 0.914427849 | 0.15916284  |
| O332 | O | 0.148720981 | 0.606092856 | 0.901689974 | O407 | O | 0.609521583 | 0.012646143 | 0.788229083 |
| O333 | O | 0.171320571 | 0.421661922 | 0.397623438 | O408 | O | 0.699677109 | 0.299619236 | 0.649981859 |
| O334 | O | 0.629651244 | 0.602807838 | 0.233035878 | O409 | O | 0.421799137 | 0.837857386 | 0.660514275 |
| O335 | O | 0.039596742 | 0.876761068 | 0.658078856 | O410 | O | 0.684773003 | 0.921274168 | 0.880472168 |
| O336 | O | 0.688978664 | 0.375568672 | 0.793073998 | O411 | O | 0.900765659 | 0.254818437 | 0.214252747 |
| O337 | O | 0.374316226 | 0.554747375 | 0.174989581 | O412 | O | 0.723527801 | 0.41509906  | 0.696677483 |
| O338 | O | 0.682269816 | 0.316952829 | 0.274612925 | O413 | O | 0.094803921 | 0.198529561 | 0.581114161 |
| O339 | O | 0.438043825 | 0.633248351 | 0.176384581 | O414 | O | 0.362161081 | 0.65763907  | 0.116250979 |
| O340 | O | 0.119886777 | 0.471197029 | 0.018922606 | O415 | O | 0.432595373 | 0.39383954  | 0.228836772 |
| O341 | O | 0.36152799  | 0.361141953 | 0.494238034 | O416 | O | 0.946061414 | 0.611158538 | 0.733086285 |
| O342 | O | 0.674877179 | 0.068207306 | 0.415300577 | O417 | O | 0.356258213 | 0.772768476 | 0.643152914 |
| O343 | O | 0.299124348 | 0.962396106 | 0.46823351  | O418 | O | 0.706180716 | 0.249392943 | 0.012771524 |
| O344 | O | 0.166093031 | 0.893676805 | 0.957271939 | O419 | O | 0.114756932 | 0.483289372 | 0.21413707  |
| O345 | O | 0.726249164 | 0.898861063 | 0.582292092 | O420 | O | 0.486872954 | 0.305214473 | 0.827002136 |
| O346 | O | 0.280546097 | 0.834182762 | 0.832169149 | O421 | O | 0.826964547 | 0.24693021  | 0.978992166 |
| O347 | O | 0.261010453 | 0.81321626  | 0.257306958 | O422 | O | 0.928174515 | 0.707120957 | 0.326565363 |
| O348 | O | 0.260226746 | 0.59661556  | 0.438983603 | O423 | O | 0.667712114 | 0.758461978 | 0.098881772 |
| O349 | O | 0.699556022 | 0.144099405 | 0.606376829 | O424 | O | 0.53307922  | 0.450098141 | 0.431040941 |
| O350 | O | 0.165518397 | 0.797592009 | 0.798775088 | O425 | O | 0.266561791 | 0.82162933  | 0.555904581 |
| O351 | O | 0.346030103 | 0.517151749 | 0.96529199  | O426 | O | 0.702952911 | 0.500431985 | 0.950009392 |
| O352 | O | 0.927719516 | 0.533890903 | 0.240195459 | O427 | O | 0.218644761 | 0.927102231 | 0.486692778 |
| O353 | O | 0.175510927 | 0.331735324 | 0.837113682 | O428 | O | 0.387712829 | 0.697917728 | 0.982790795 |
| O354 | O | 0.264108207 | 0.891173464 | 0.213434721 | O429 | O | 0.77319976  | 0.299584271 | 0.702368153 |
| O355 | O | 0.605929202 | 0.885909524 | 0.245145479 | O430 | O | 0.816668025 | 0.22941903  | 0.504358407 |
| O356 | O | 0.288402779 | 0.355163903 | 0.548843258 | O431 | O | 0.958532486 | 0.721248464 | 0.000532326 |
| O357 | O | 0.424130435 | 0.391772356 | 0.901142808 | O432 | O | 0.593346289 | 0.063789384 | 0.533419661 |
| O358 | O | 0.114065193 | 0.257827924 | 0.356826119 | O433 | O | 0.445173904 | 0.9912112   | 0.58682382  |
| O359 | O | 0.229172167 | 0.405071197 | 0.503389231 | O434 | O | 0.818765771 | 0.269848837 | 0.417877145 |
| O360 | O | 0.803102989 | 0.939579449 | 0.483758394 | O435 | O | 0.334027053 | 0.988780555 | 0.594975498 |
| O361 | O | 0.698215424 | 0.272949785 | 0.198375661 | O436 | O | 0.108591683 | 0.820796495 | 0.670642251 |
| O362 | O | 0.240055454 | 0.67480703  | 0.387295291 | O437 | O | 0.294276882 | 0.466615692 | 0.91093778  |
| O363 | O | 0.627108345 | 0.086225744 | 0.172523666 | O438 | O | 0.671513482 | 0.435229004 | 0.082282601 |
| O364 | O | 0.223965484 | 0.397760061 | 0.597400897 | O439 | O | 0.950992141 | 0.947936475 | 0.454228073 |
| O365 | O | 0.176945309 | 0.24494555  | 0.704319758 | O440 | O | 0.758027773 | 0.163805599 | 0.754599407 |
| O366 | O | 0.940123903 | 0.930855952 | 0.767728444 | O441 | O | 0.737128316 | 0.737431177 | 0.399549218 |
| O367 | O | 0.843535757 | 0.579880461 | 0.529213864 | O442 | O | 0.237653951 | 0.077457331 | 0.127901835 |
| O368 | O | 0.826550814 | 0.058599708 | 0.240180339 | O443 | O | 0.992456061 | 0.679829998 | 0.475683575 |
| O369 | O | 0.107557313 | 0.368693006 | 0.520652637 | O444 | O | 0.635089722 | 0.448652231 | 0.384314847 |
| O370 | O | 0.920302839 | 0.17442215  | 0.020682985 | O445 | O | 0.219603979 | 0.01475331  | 0.462413931 |
| O371 | O | 0.443511532 | 0.271185228 | 0.126605786 | O446 | O | 0.579056382 | 0.528345438 | 0.232820617 |
| O372 | O | 0.892150952 | 0.900905281 | 0.648924594 | O447 | O | 0.182716012 | 0.114311954 | 0.189352345 |
| O373 | O | 0.262588285 | 0.720410739 | 0.205942429 | O448 | O | 0.433670847 | 0.092289836 | 0.153754162 |
| O374 | O | 0.784047466 | 0.799769326 | 0.791919758 | O449 | O | 0.617584826 | 0.085767751 | 0.840052876 |
| O375 | O | 0.018520227 | 0.539302563 | 0.864161663 | O450 | O | 0.022225316 | 0.468437826 | 0.553147556 |
| O376 | O | 0.992259164 | 0.511331608 | 0.105016855 | O451 | O | 0.174703895 | 0.613901057 | 0.40046184  |
| O377 | O | 0.402319852 | 0.984623919 | 0.332525357 | O452 | O | 0.622431094 | 0.846999159 | 0.871529112 |
| O378 | O | 0.675342767 | 0.51947984  | 0.676513988 | O453 | O | 0.335074396 | 0.875765285 | 0.273419914 |
| O379 | O | 0.159591904 | 0.86846437  | 0.044443356 | O454 | O | 0.446933359 | 0.202514023 | 0.99467605  |
| O380 | O | 0.113599237 | 0.0340075   | 0.286682968 | O455 | O | 0.550214693 | 0.888678936 | 0.98398211  |
| O381 | O | 0.994962299 | 0.552592156 | 0.312663796 | O456 | O | 0.338669975 | 0.415411148 | 0.620241961 |
| O382 | O | 0.421306049 | 0.754543554 | 0.867711215 | O457 | O | 0.280042471 | 0.131578636 | 0.967780445 |
| O383 | O | 0.3854065   | 0.407460731 | 0.308740489 | O458 | O | 0.251408177 | 0.126577004 | 0.732101985 |
| O384 | O | 0.908206427 | 0.592043239 | 0.310183155 | O459 | O | 0.214646823 | 0.138798661 | 0.644596611 |
| O385 | O | 0.923274739 | 0.6390676   | 0.618328274 | O460 | O | 0.189477476 | 0.658651418 | 0.206318896 |
| O386 | O | 0.165608986 | 0.91778367  | 0.221490679 | O461 | O | 0.064993647 | 0.420032862 | 0.896348057 |
| O387 | O | 0.971079445 | 0.311008704 | 0.296571895 | O462 | O | 0.652146358 | 0.330098261 | 0.864851414 |
| O388 | O | 0.66581281  | 0.46322248  | 0.188849404 | O463 | O | 0.846437645 | 0.387401916 | 0.490186    |
| O389 | O | 0.104537144 | 0.89750219  | 0.723469205 | O464 | O | 0.916683103 | 0.065817408 | 0.719720504 |
| O390 | O | 0.411835364 | 0.816684902 | 0.540081259 | O465 | O | 0.704611019 | 0.540154055 | 0.770715543 |
| O391 | O | 0.785811219 | 0.399136597 | 0.629747776 | O466 | O | 0.344572525 | 0.350064918 | 0.908239818 |
| O392 | O | 0.452432992 | 0.983978269 | 0.124973356 | O467 | O | 0.065236875 | 0.028142778 | 0.537429699 |
| O393 | O | 0.637122425 | 0.064073481 | 0.284810211 | O468 | O | 0.010873433 | 0.870607127 | 0.767708871 |
| O394 | O | 0.230517608 | 0.209548055 | 0.853040463 | O469 | O | 0.228453446 | 0.725827528 | 0.992323227 |
| O395 | O | 0.997200349 | 0.194174311 | 0.064480685 | O470 | O | 0.32822407  | 0.879624269 | 0.451073818 |
| O396 | O | 0.239629478 | 0.863922434 | 0.004053584 | O471 | O | 0.294319031 | 0.886875051 | 0.913977251 |
| O397 | O | 0.778765284 | 0.031253538 | 0.700815101 | O472 | O | 0.952744996 | 0.055487269 | 0.522558712 |
| O398 | O | 0.963418254 | 0.988811248 | 0.369434029 | O473 | O | 0.725932906 | 0.376682076 | 0.884224427 |
| O399 | O | 0.814057437 | 0.882431259 | 0.81277561  | O474 | O | 0.625460207 | 0.719958642 | 0.566253001 |
| O400 | O | 0.458373362 | 0.201939769 | 0.552885669 | O475 | O | 0.24837449  | 0.889905206 | 0.303125272 |
| O401 | O | 0.99650013  | 0.215617848 | 0.762593131 | O476 | O | 0.094526919 | 0.89832137  | 0.489320246 |
| O402 | O | 0.55914655  | 0.762306093 | 0.27624588  | O477 | O | 0.400891938 | 0.589255308 | 0.978288391 |
| O403 | O | 0.424678485 | 0.537885936 | 0.807377827 | O478 | O | 0.189607382 | 0.233120525 | 0.165820889 |
| O404 | O | 0.112876136 | 0.334977873 | 0.414068657 | O479 | O | 0.729865683 | 0.871422977 | 0.767412414 |
| O405 | O | 0.736853752 | 0.636213424 | 0.736722223 | O480 | O | 0.357945483 | 0.922688655 | 0.967773397 |

|      |   |             |             |             |      |   |             |             |             |
|------|---|-------------|-------------|-------------|------|---|-------------|-------------|-------------|
| O481 | O | 0.860066203 | 0.060585235 | 0.047953895 | O556 | O | 0.392783652 | 0.990253928 | 0.51399982  |
| O482 | O | 0.299099401 | 0.344579349 | 0.430354431 | O557 | O | 0.129653491 | 0.111329376 | 0.934676282 |
| O483 | O | 0.340768531 | 0.868548802 | 0.132453465 | O558 | O | 0.078114099 | 0.951916686 | 0.048612436 |
| O484 | O | 0.993260532 | 0.232077234 | 0.55453733  | O559 | O | 0.109671106 | 0.642367374 | 0.306812164 |
| O485 | O | 0.763114308 | 0.963708088 | 0.76558829  | O560 | O | 0.126726869 | 0.960825308 | 0.550008791 |
| O486 | O | 0.106009654 | 0.118450886 | 0.028017744 | O561 | O | 0.970998937 | 0.586587662 | 0.549832062 |
| O487 | O | 0.941584034 | 0.276696843 | 0.612427534 | O562 | O | 0.767730846 | 0.400537577 | 0.539817862 |
| O488 | O | 0.54880713  | 0.36799818  | 0.474492355 | O563 | O | 0.441903336 | 0.568465627 | 0.103012567 |
| O489 | O | 0.694335964 | 0.402435456 | 0.997974179 | O564 | O | 0.671589382 | 0.019701339 | 0.933509232 |
| O490 | O | 0.322402222 | 0.655746973 | 0.028203314 | O565 | O | 0.19552556  | 0.307351607 | 0.371354879 |
| O491 | O | 0.152800472 | 0.370376281 | 0.203018019 | O566 | O | 0.381089744 | 0.330777941 | 0.09022564  |
| O492 | O | 0.729014951 | 0.52325103  | 0.217455388 | O567 | O | 0.597300423 | 0.261147156 | 0.174259453 |
| O493 | O | 0.233966977 | 0.949361212 | 0.400801322 | O568 | O | 0.508316632 | 0.408113877 | 0.559944653 |
| O494 | O | 0.921069888 | 0.274422628 | 0.732807244 | O569 | O | 0.685813558 | 0.655065324 | 0.068555233 |
| O495 | O | 0.418459516 | 0.963422266 | 0.784323905 | O570 | O | 0.478325485 | 0.677131508 | 0.995189904 |
| O496 | O | 0.958336419 | 0.187982143 | 0.169776202 | O571 | O | 0.086354587 | 0.208244594 | 0.685576159 |
| O497 | O | 0.515112499 | 0.752031539 | 0.182053038 | O572 | O | 0.065977953 | 0.184031499 | 0.476045874 |
| O498 | O | 0.659198216 | 0.572627229 | 0.59381979  | O573 | O | 0.343269432 | 0.718667892 | 0.748381086 |
| O499 | O | 0.75813     | 0.919616794 | 0.664478218 | O574 | O | 0.280477541 | 0.756262016 | 0.694465872 |
| O500 | O | 0.943239289 | 0.308863213 | 0.830428407 | O575 | O | 0.676902906 | 0.009128852 | 0.226525148 |
| O501 | O | 0.470708368 | 0.254510373 | 0.725237111 | O576 | O | 0.887296808 | 0.906979834 | 0.278510534 |
| O502 | O | 0.894354494 | 0.217481224 | 0.803524339 | O577 | O | 0.783023377 | 0.325316858 | 0.974162862 |
| O503 | O | 0.275278282 | 0.63379894  | 0.533333643 | O578 | O | 0.271023964 | 0.630136649 | 0.230013254 |
| O504 | O | 0.85250561  | 0.622353293 | 0.756757303 | O579 | O | 0.950683211 | 0.433563605 | 0.624193112 |
| O505 | O | 0.764572613 | 0.48478791  | 0.658546043 | O580 | O | 0.773754188 | 0.631891691 | 0.094521251 |
| O506 | O | 0.565399839 | 0.986402369 | 0.25490525  | O581 | O | 0.482419995 | 0.67198248  | 0.67362856  |
| O507 | O | 0.099739449 | 0.222148851 | 0.12165235  | O582 | O | 0.516121384 | 0.767586902 | 0.863998366 |
| O508 | O | 0.128957691 | 0.279541624 | 0.774764785 | O583 | O | 0.059012488 | 0.440953763 | 0.272624313 |
| O509 | O | 0.020671506 | 0.708788415 | 0.321329155 | O584 | O | 0.488745213 | 0.437750791 | 0.155449527 |
| O510 | O | 0.194268088 | 0.988840267 | 0.296702804 | O585 | O | 0.432293755 | 0.331383678 | 0.30047546  |
| O511 | O | 0.580606664 | 0.699000465 | 0.148736528 | O586 | O | 0.553363728 | 0.683156353 | 0.491519967 |
| O512 | O | 0.728544918 | 0.431032603 | 0.253305075 | O587 | O | 0.338636124 | 0.027582244 | 0.880800738 |
| O513 | O | 0.131543436 | 0.707208264 | 0.02304364  | O588 | O | 0.056515207 | 0.034632471 | 0.118456251 |
| O514 | O | 0.067158881 | 0.661439501 | 0.424577243 | O589 | O | 0.299683384 | 0.979494258 | 0.119748585 |
| O515 | O | 0.282191209 | 0.115558    | 0.483212478 | O590 | O | 0.276307172 | 0.2227526   | 0.989389516 |
| O516 | O | 0.174333198 | 0.245557013 | 0.613510196 | O591 | O | 0.960762174 | 0.551493673 | 0.634372417 |
| O517 | O | 0.473821049 | 0.875813777 | 0.572387166 | O592 | O | 0.697582984 | 0.640573526 | 0.821187397 |
| O518 | O | 0.845046666 | 0.776180086 | 0.633774589 | O593 | O | 0.467127477 | 0.727946195 | 0.78866883  |
| O519 | O | 0.918293973 | 0.279925835 | 0.525067683 | O594 | O | 0.595512132 | 0.598073621 | 0.055484037 |
| O520 | O | 0.462793481 | 0.679445237 | 0.512515375 | O595 | O | 0.269987158 | 0.07534945  | 0.811930591 |
| O521 | O | 0.311071715 | 0.91763171  | 0.793871609 | O596 | O | 0.178322925 | 0.090641357 | 0.578183365 |
| O522 | O | 0.05103945  | 0.6694703   | 0.999233224 | O597 | O | 0.736256593 | 0.01062961  | 0.499565949 |
| O523 | O | 0.100405686 | 0.486555293 | 0.495145092 | O598 | O | 0.702507188 | 0.646340632 | 0.38118951  |
| O524 | O | 0.710786721 | 0.012608302 | 0.642990553 | O599 | O | 0.085648675 | 0.282818209 | 0.535428041 |
| O525 | O | 0.154902453 | 0.632107082 | 0.530981318 | O600 | O | 0.05508099  | 0.821571751 | 0.445146406 |
| O526 | O | 0.371834479 | 0.399869514 | 0.410002987 | O601 | O | 0.023688125 | 0.195321768 | 0.848892671 |
| O527 | O | 0.576329338 | 0.973044944 | 0.54945901  | O602 | O | 0.787092923 | 0.53926586  | 0.440143674 |
| O528 | O | 0.491997848 | 0.835542338 | 0.486970863 | O603 | O | 0.048714536 | 0.567261244 | 0.947445018 |
| O529 | O | 0.264259056 | 0.995288804 | 0.201649807 | O604 | O | 0.426384494 | 0.053277075 | 0.865654989 |
| O530 | O | 0.302307644 | 0.152408733 | 0.054868303 | O605 | O | 0.402325039 | 0.246172564 | 0.872046137 |
| O531 | O | 0.801532321 | 0.315399067 | 0.530732429 | O606 | O | 0.744730995 | 0.970769955 | 0.40881551  |
| O532 | O | 0.109980687 | 0.313909892 | 0.121255539 | O607 | O | 0.086787429 | 0.142926541 | 0.398574843 |
| O533 | O | 0.284844577 | 0.799185592 | 0.118353626 | O608 | O | 0.873878679 | 0.11653065  | 0.515370056 |
| O534 | O | 0.059673758 | 0.047197596 | 0.804438167 | O609 | O | 0.987970295 | 0.633242607 | 0.391779729 |
| O535 | O | 0.741165098 | 0.743781044 | 0.049369314 | O610 | O | 0.749839139 | 0.383917951 | 0.069365233 |
| O536 | O | 0.51713165  | 0.354714494 | 0.128173558 | O611 | O | 0.885759703 | 0.823502865 | 0.320234296 |
| O537 | O | 0.880157681 | 0.323334916 | 0.301662217 | O612 | O | 0.026648509 | 0.498451332 | 0.210276415 |
| O538 | O | 0.024970721 | 0.345641399 | 0.560809095 | O613 | O | 0.123603553 | 0.472007467 | 0.845916977 |
| O539 | O | 0.417674653 | 0.919117933 | 0.067890045 | O614 | O | 0.359643562 | 0.711741246 | 0.382317777 |
| O540 | O | 0.674062237 | 0.34503319  | 0.557308254 | O615 | O | 0.671073751 | 0.539887966 | 0.870339387 |
| O541 | O | 0.983850784 | 0.080176883 | 0.086243796 | O616 | O | 0.46409889  | 0.13226204  | 0.470598561 |
| O542 | O | 0.425369146 | 0.747573053 | 0.70331621  | O617 | O | 0.279148751 | 0.657720807 | 0.710547204 |
| O543 | O | 0.297090712 | 0.211954454 | 0.462159277 | O618 | O | 0.198229802 | 0.723015758 | 0.904874297 |
| O544 | O | 0.035963429 | 0.949251029 | 0.5707751   | O619 | O | 0.436260913 | 0.463661361 | 0.52056924  |
| O545 | O | 0.630910384 | 0.211024164 | 0.102167018 | O620 | O | 0.536297183 | 0.201734129 | 0.133189829 |
| O546 | O | 0.913264428 | 0.071734764 | 0.432179634 | O621 | O | 0.379822831 | 0.497292492 | 0.880721217 |
| O547 | O | 0.487419476 | 0.865692079 | 0.339159953 | O622 | O | 0.606903377 | 0.160482286 | 0.88885642  |
| O548 | O | 0.390524069 | 0.171748988 | 0.817659564 | O623 | O | 0.028294827 | 0.740530683 | 0.113249481 |
| O549 | O | 0.251661021 | 0.888276064 | 0.106394911 | O624 | O | 0.536340036 | 0.091051413 | 0.88300512  |
| O550 | O | 0.041458274 | 0.869945686 | 0.060529807 | O625 | O | 0.239032535 | 0.587207312 | 0.005601377 |
| O551 | O | 0.710830194 | 0.562633041 | 0.072976264 | O626 | O | 0.872281169 | 0.381377458 | 0.611910087 |
| O552 | O | 0.462373816 | 0.156510668 | 0.379093776 | O627 | O | 0.183694499 | 0.567307377 | 0.112419621 |
| O553 | O | 0.793145059 | 0.61009908  | 0.598836375 | O628 | O | 0.273239897 | 0.02893865  | 0.043530417 |
| O554 | O | 0.262663452 | 0.721956691 | 0.498434002 | O629 | O | 0.446264383 | 0.460566953 | 0.610071782 |
| O555 | O | 0.47509407  | 0.101495897 | 0.067212875 | O630 | O | 0.239729262 | 0.475465096 | 0.358483228 |



|      |   |             |             |             |      |   |             |             |             |
|------|---|-------------|-------------|-------------|------|---|-------------|-------------|-------------|
| O631 | O | 0.612783576 | 0.274451588 | 0.551689998 | O706 | O | 0.823773309 | 0.134676482 | 0.926772292 |
| O632 | O | 0.367808282 | 0.239918114 | 0.083064498 | O707 | O | 0.120147902 | 0.110408204 | 0.476953873 |
| O633 | O | 0.111262373 | 0.335557185 | 0.606456399 | O708 | O | 0.473950252 | 0.779841366 | 0.302489304 |
| O634 | O | 0.17531024  | 0.805440332 | 0.982218795 | O709 | O | 0.982689989 | 0.052909729 | 0.172889902 |
| O635 | O | 0.81477726  | 0.526390719 | 0.311680195 | O710 | O | 0.104132481 | 0.491759834 | 0.933043892 |
| O636 | O | 0.090515973 | 0.238271082 | 0.935602029 | O711 | O | 0.2149584   | 0.321535594 | 0.00843516  |
| O637 | O | 0.480486542 | 0.089040656 | 0.977823161 | O712 | O | 0.034841249 | 0.633778506 | 0.887280895 |
| O638 | O | 0.352573501 | 0.790989488 | 0.214203818 | O713 | O | 0.90809107  | 0.743314325 | 0.072532214 |
| O639 | O | 0.81301707  | 0.693352565 | 0.647458876 | O714 | O | 0.786052217 | 0.966351919 | 0.590804427 |
| O640 | O | 0.424108351 | 0.077123817 | 0.412635295 | O715 | O | 0.88798638  | 0.456185475 | 0.563673777 |
| O641 | O | 0.674105161 | 0.144124589 | 0.779163792 | O716 | O | 0.624829767 | 0.446370533 | 0.286070638 |
| O642 | O | 0.186367896 | 0.808513386 | 0.144684326 | O717 | O | 0.514618438 | 0.221887715 | 0.938267938 |
| O643 | O | 0.052558525 | 0.967536829 | 0.755020308 | O718 | O | 0.245728249 | 0.055325267 | 0.62756691  |
| O644 | O | 0.969989842 | 0.907157491 | 0.210333209 | O719 | O | 0.86210291  | 0.115723544 | 0.843626383 |
| O645 | O | 0.393023801 | 0.255104745 | 0.506554942 | O720 | O | 0.179550932 | 0.148679111 | 0.102499977 |
| O646 | O | 0.941455329 | 0.394387709 | 0.334812825 | N1   | N | 0.507568725 | 0.559626032 | 0.406019753 |
| O647 | O | 0.842339162 | 0.28974711  | 0.787316841 | N2   | N | 0.590913476 | 0.242540885 | 0.357190997 |
| O648 | O | 0.444369774 | 0.768811989 | 0.001715988 | N3   | N | 0.624478962 | 0.846444848 | 0.391651346 |
| O649 | O | 0.268429977 | 0.667417334 | 0.925172032 | N4   | N | 0.850797625 | 0.892861249 | 0.928823397 |
| O650 | O | 0.709813458 | 0.136220019 | 0.47070113  | N5   | N | 0.051635687 | 0.733765062 | 0.748684567 |
| O651 | O | 0.74290799  | 0.216992693 | 0.674652725 | N6   | N | 0.980747184 | 0.458699527 | 0.426522191 |
| O652 | O | 0.179974617 | 0.073775261 | 0.33223396  | N7   | N | 0.87814135  | 0.754173573 | 0.50976463  |
| O653 | O | 0.778203486 | 0.117956407 | 0.648514436 | N8   | N | 0.273132517 | 0.447656686 | 0.156080355 |
| O654 | O | 0.328024288 | 0.140631645 | 0.641213175 | N9   | N | 0.000836375 | 0.418132538 | 0.755390699 |
| O655 | O | 0.081869323 | 0.130088327 | 0.640727464 | N10  | N | 0.58406717  | 0.466042126 | 0.705284721 |
| O656 | O | 0.706472372 | 0.254565679 | 0.54590627  | N11  | N | 0.550644614 | 0.830079065 | 0.680584002 |
| O657 | O | 0.455344246 | 0.952186282 | 0.69993397  | N12  | N | 0.827197015 | 0.716051468 | 0.219735084 |
| O658 | O | 0.410957259 | 0.385689724 | 0.56653209  | N13  | N | 0.612804877 | 0.664348804 | 0.938955583 |
| O659 | O | 0.760010318 | 0.467479315 | 0.791720691 | N14  | N | 0.885123986 | 0.449371399 | 0.11636578  |
| O660 | O | 0.043146531 | 0.123697219 | 0.136862456 | N15  | N | 0.104704591 | 0.82019559  | 0.317564893 |
| O661 | O | 0.34593875  | 0.969022697 | 0.043860408 | N16  | N | 0.180733863 | 0.995688959 | 0.864893908 |
| O662 | O | 0.198089194 | 0.855408933 | 0.860841982 | N17  | N | 0.714881989 | 0.140804765 | 0.100687412 |
| O663 | O | 0.657494317 | 0.302171473 | 0.470364136 | N18  | N | 0.295105322 | 0.188950094 | 0.30599626  |
| O664 | O | 0.161007761 | 0.068041693 | 0.663832267 | N19  | N | 0.570925465 | 0.149785997 | 0.635924563 |
| O665 | O | 0.841217798 | 0.218828147 | 0.722256975 | N20  | N | 0.278669502 | 0.528570825 | 0.712643988 |
| O666 | O | 0.954598527 | 0.970819034 | 0.668097882 | N21  | N | 0.941149203 | 0.136147766 | 0.336293722 |
| O667 | O | 0.537702635 | 0.952062777 | 0.781944161 | C1   | C | 0.543272446 | 0.242348734 | 0.332177536 |
| O668 | O | 0.349673336 | 0.788212273 | 0.468284895 | C2   | C | 0.560085133 | 0.809712437 | 0.729256366 |
| O669 | O | 0.359073096 | 0.174086063 | 0.984519178 | C3   | C | 0.833646754 | 0.688326747 | 0.173548489 |
| O670 | O | 0.392151084 | 0.946440236 | 0.416133123 | C4   | C | 0.816488112 | 0.932120674 | 0.915965458 |
| O671 | O | 0.304276424 | 0.424563584 | 0.82950287  | C5   | C | 0.545145643 | 0.506613146 | 0.699772581 |
| O672 | O | 0.911695468 | 0.194723894 | 0.570834912 | C6   | C | 0.618821894 | 0.197265576 | 0.345594876 |
| O673 | O | 0.821577441 | 0.993006181 | 0.300795764 | C7   | C | 0.007450572 | 0.713204262 | 0.72728264  |
| O674 | O | 0.727383461 | 0.47728565  | 0.469220783 | C8   | C | 0.097292638 | 0.705775499 | 0.726618557 |
| O675 | O | 0.973380337 | 0.888067944 | 0.116475122 | C9   | C | 0.225740671 | 0.468775816 | 0.173700895 |
| O676 | O | 0.970213367 | 0.780926846 | 0.276676493 | C10  | C | 0.950386118 | 0.486641127 | 0.462433561 |
| O677 | O | 0.57152511  | 0.416602994 | 0.011706926 | C11  | C | 0.607124102 | 0.699825207 | 0.982227269 |
| O678 | O | 0.815277187 | 0.851016182 | 0.723666295 | C12  | C | 0.838489978 | 0.683493863 | 0.261386533 |
| O679 | O | 0.266265433 | 0.930698581 | 0.589744043 | C13  | C | 0.756258787 | 0.175886457 | 0.105992716 |
| O680 | O | 0.604624903 | 0.820430426 | 0.179644358 | C14  | C | 0.226374133 | 0.52575543  | 0.693835569 |
| O681 | O | 0.288808356 | 0.997474162 | 0.288502783 | C15  | C | 0.114958049 | 0.863789768 | 0.348312717 |
| O682 | O | 0.179971601 | 0.731087638 | 0.097692735 | C16  | C | 0.014233464 | 0.453609336 | 0.714424711 |
| O683 | O | 0.851680901 | 0.972386539 | 0.725051738 | C17  | C | 0.137762781 | 0.777368827 | 0.32882141  |
| O684 | O | 0.372795093 | 0.411285564 | 0.974573639 | C18  | C | 0.504234033 | 0.587919073 | 0.36132702  |
| O685 | O | 0.198629341 | 0.766369697 | 0.576008898 | C19  | C | 0.008699266 | 0.366531639 | 0.742026282 |
| O686 | O | 0.688572633 | 0.710627619 | 0.756312391 | C20  | C | 0.524420473 | 0.151837737 | 0.664589892 |
| O687 | O | 0.844654298 | 0.123331921 | 0.708132678 | C21  | C | 0.913644877 | 0.761940861 | 0.469854729 |
| O688 | O | 0.79018367  | 0.226113198 | 0.241185474 | C22  | C | 0.967229414 | 0.088641565 | 0.319482491 |
| O689 | O | 0.956643843 | 0.717338361 | 0.172457336 | C23  | C | 0.70946516  | 0.128167919 | 0.047026311 |
| O690 | O | 0.708432754 | 0.175575479 | 0.250108102 | C24  | C | 0.349359955 | 0.191272301 | 0.310920712 |
| O691 | O | 0.636702392 | 0.602096763 | 0.680415526 | C25  | C | 0.304484324 | 0.436313957 | 0.199626533 |
| O692 | O | 0.821258663 | 0.198247997 | 0.86174354  | C26  | C | 0.23266346  | 0.997277681 | 0.881821919 |
| O693 | O | 0.834553416 | 0.923373442 | 0.126277857 | C27  | C | 0.6679015   | 0.653381992 | 0.935884932 |
| O694 | O | 0.670427054 | 0.447350392 | 0.883562222 | C28  | C | 0.002445878 | 0.41398625  | 0.448214971 |
| O695 | O | 0.173059094 | 0.173496702 | 0.993650168 | C29  | C | 0.557849143 | 0.416140063 | 0.691370395 |
| O696 | O | 0.794604958 | 0.866813698 | 0.216513849 | C30  | C | 0.609004755 | 0.17442829  | 0.665212563 |
| O697 | O | 0.785965354 | 0.530154408 | 0.733466096 | C31  | C | 0.148756707 | 0.994183187 | 0.912740546 |
| O698 | O | 0.392836958 | 0.385482542 | 0.685259362 | C32  | C | 0.963759702 | 0.179539666 | 0.305923846 |
| O699 | O | 0.76885507  | 0.334175424 | 0.174194747 | C33  | C | 0.311736406 | 0.552587166 | 0.674425793 |
| O700 | O | 0.816744072 | 0.173001351 | 0.419907643 | C34  | C | 0.458448851 | 0.54482018  | 0.426172781 |
| O701 | O | 0.313638004 | 0.483621387 | 0.441061998 | C35  | C | 0.827741473 | 0.752662923 | 0.493123854 |
| O702 | O | 0.815388742 | 0.282938924 | 0.895907847 | C36  | C | 0.630234501 | 0.899887292 | 0.396517531 |
| O703 | O | 0.987202628 | 0.942817043 | 0.022523229 | C37  | C | 0.659690512 | 0.830223902 | 0.348314946 |
| O704 | O | 0.878401729 | 0.985516975 | 0.600184864 | C38  | C | 0.273507315 | 0.234577978 | 0.327024383 |
| O705 | O | 0.530377599 | 0.173401351 | 0.017377292 | C39  | C | 0.871040635 | 0.412883276 | 0.153786082 |

|      |   |             |             |             |     |   |             |             |             |
|------|---|-------------|-------------|-------------|-----|---|-------------|-------------|-------------|
| C40  | C | 0.595618748 | 0.816741067 | 0.649142708 | H10 | H | 0.76337799  | 0.418006622 | 0.167849749 |
| C41  | C | 0.894420267 | 0.892300442 | 0.898351704 | H11 | H | 0.948820613 | 0.046721791 | 0.175596987 |
| C42  | C | 0.893434783 | 0.425176508 | 0.068406292 | H12 | H | 0.223673622 | 0.014380975 | 0.957199418 |
| C43  | C | 0.038706662 | 0.366311994 | 0.694473985 | H13 | H | 0.233474832 | 0.615830633 | 0.849471835 |
| C44  | C | 0.869415509 | 0.650144356 | 0.18121239  | H14 | H | 0.630066706 | 0.680583891 | 0.91353561  |
| C45  | C | 0.11773087  | 0.746361011 | 0.372744202 | H15 | H | 0.302437389 | 0.510402744 | 0.420398809 |
| C46  | C | 0.008641715 | 0.198724043 | 0.332351273 | H16 | H | 0.719571788 | 0.83377534  | 0.025739598 |
| C47  | C | 0.285152672 | 0.564305859 | 0.628327002 | H17 | H | 0.884557603 | 0.320948037 | 0.988602532 |
| C48  | C | 0.607932987 | 0.464791771 | 0.757896514 | H18 | H | 0.359462551 | 0.211338526 | 0.290555032 |
| C49  | C | 0.082088469 | 0.654145337 | 0.70922738  | H19 | H | 0.80432852  | 0.676799947 | 0.165483507 |
| C50  | C | 0.58750956  | 0.202873071 | 0.710464573 | H20 | H | 0.231945449 | 0.472522516 | 0.245308751 |
| C51  | C | 0.544792703 | 0.559567888 | 0.447169437 | H21 | H | 0.524524128 | 0.575168204 | 0.3412221   |
| C52  | C | 0.7109483   | 0.852677873 | 0.352712786 | H22 | H | 0.88718124  | 0.872078152 | 0.870796191 |
| C53  | C | 0.181157915 | 0.0059048   | 0.812292398 | H23 | H | 0.740273918 | 0.1423687   | 0.486681592 |
| C54  | C | 0.36412937  | 0.209182752 | 0.362787466 | H24 | H | 0.960627864 | 0.349804381 | 0.451101363 |
| C55  | C | 0.842604717 | 0.972536068 | 0.892928061 | H25 | H | 0.535044276 | 0.177015614 | 0.579490533 |
| C56  | C | 0.283384159 | 0.555883473 | 0.760447232 | H26 | H | 0.999913132 | 0.709672665 | 0.466301183 |
| C57  | C | 0.693144439 | 0.69335557  | 0.961473915 | H27 | H | 0.55327102  | 0.176396967 | 0.316634765 |
| C58  | C | 0.159166019 | 0.858419072 | 0.378103016 | H28 | H | 0.768320699 | 0.86393417  | 0.544604371 |
| C59  | C | 0.812497204 | 0.803974576 | 0.48583749  | H29 | H | 0.420916798 | 0.100986015 | 0.267065136 |
| C60  | C | 0.939120684 | 0.873807639 | 0.928677761 | H30 | H | 0.932148473 | 0.444725503 | 0.743390889 |
| C61  | C | 0.946332297 | 0.425764204 | 0.765071145 | H31 | H | 0.997145919 | 0.159843048 | 0.072823919 |
| C62  | C | 0.099271015 | 0.975055569 | 0.89776225  | H32 | H | 0.348850681 | 0.336597246 | 0.08227847  |
| C63  | C | 0.582942303 | 0.245034962 | 0.411842152 | H33 | H | 0.622219898 | 0.398158391 | 0.663005949 |
| C64  | C | 0.86386168  | 0.379222196 | 0.070629636 | H34 | H | 0.870564416 | 0.766733423 | 0.24787209  |
| C65  | C | 0.964208175 | 0.380063394 | 0.469569053 | H35 | H | 0.522692302 | 0.014358451 | 0.332265498 |
| C66  | C | 0.58219409  | 0.621057566 | 0.914996125 | H36 | H | 0.354845669 | 0.756814036 | 0.451859527 |
| C67  | C | 0.581076489 | 0.921759933 | 0.38602678  | H37 | H | 0.556231891 | 0.588751107 | 0.451767042 |
| C68  | C | 0.053407565 | 0.488013177 | 0.736294331 | H38 | H | 0.850670037 | 0.426748329 | 0.246913573 |
| C69  | C | 0.563125354 | 0.182242101 | 0.589314572 | H39 | H | 0.586677938 | 0.451346497 | 0.782186716 |
| C70  | C | 0.105823587 | 0.832578978 | 0.266137868 | H40 | H | 0.80239454  | 0.841762684 | 0.943680013 |
| C71  | C | 0.582589505 | 0.160897295 | 0.321308695 | H41 | H | 0.76228794  | 0.049330536 | 0.862933348 |
| C72  | C | 0.824851961 | 0.846247827 | 0.91810276  | H42 | H | 0.88951687  | 0.489248163 | 0.563830207 |
| C73  | C | 0.782696587 | 0.183048749 | 0.058254183 | H43 | H | 0.630364743 | 0.871341169 | 0.960123431 |
| C74  | C | 0.563302606 | 0.771791681 | 0.6621475   | H44 | H | 0.776518005 | 0.165646357 | 0.127743548 |
| C75  | C | 0.656880878 | 0.118997886 | 0.035878703 | H45 | H | 0.151725959 | 0.092445568 | 0.922368892 |
| C76  | C | 0.592026589 | 0.384163276 | 0.664805994 | H46 | H | 0.060958595 | 0.338154442 | 0.692785574 |
| C77  | C | 0.234235942 | 0.986054221 | 0.937198209 | H47 | H | 0.611392046 | 0.995141568 | 0.87483748  |
| C78  | C | 0.543079433 | 0.886789854 | 0.684063904 | H48 | H | 0.582992259 | 0.889805332 | 0.268817965 |
| C79  | C | 0.541684958 | 0.287627363 | 0.303515078 | H49 | H | 0.320662831 | 0.183152064 | 0.574703782 |
| C80  | C | 0.58626238  | 0.748169971 | 0.964897987 | H50 | H | 0.140860331 | 0.758639452 | 0.298682144 |
| C81  | C | 0.608355965 | 0.825550888 | 0.747699892 | H51 | H | 0.241031204 | 0.233796577 | 0.320913354 |
| C82  | C | 0.022027962 | 0.490459741 | 0.411343165 | H52 | H | 0.332621651 | 0.32515453  | 0.027167242 |
| C83  | C | 0.431651691 | 0.516659588 | 0.383847784 | H53 | H | 0.379728084 | 0.043407864 | 0.695724313 |
| C84  | C | 0.886531063 | 0.134102805 | 0.329569029 | H54 | H | 0.715287237 | 0.876115374 | 0.334698131 |
| C85  | C | 0.053716512 | 0.726895922 | 0.803807178 | H55 | H | 0.595042233 | 0.151892607 | 0.291306182 |
| C86  | C | 0.496604892 | 0.483639116 | 0.705669653 | H56 | H | 0.78952001  | 0.263388537 | 0.401894686 |
| C87  | C | 0.297046993 | 0.482393346 | 0.122737302 | H57 | H | 0.167291238 | 0.790855496 | 0.334978226 |
| C88  | C | 0.808284558 | 0.698599536 | 0.308625589 | H58 | H | 0.529554411 | 0.107721147 | 0.913726403 |
| C89  | C | 0.907641484 | 0.508539239 | 0.43924712  | H59 | H | 0.161285322 | 0.71178398  | 0.489633555 |
| C90  | C | 0.999945184 | 0.098303212 | 0.278220767 | H60 | H | 0.185792424 | 0.318685365 | 0.515555397 |
| C91  | C | 0.914413193 | 0.396222167 | 0.179601736 | H61 | H | 0.024333202 | 0.699462022 | 0.288635108 |
| C92  | C | 0.208150215 | 0.47135531  | 0.703879447 | H62 | H | 0.711747251 | 0.85021161  | 0.758461387 |
| C93  | C | 0.517162059 | 0.641206831 | 0.375366368 | H63 | H | 0.437868721 | 0.421074045 | 0.913156843 |
| C94  | C | 0.920022592 | 0.814487978 | 0.461402618 | H64 | H | 0.203961853 | 0.447145065 | 0.178010197 |
| C95  | C | 0.728849826 | 0.097130218 | 0.12976055  | H65 | H | 0.886687879 | 0.642875753 | 0.210646149 |
| C96  | C | 0.50412537  | 0.102652729 | 0.662350109 | H66 | H | 0.369269322 | 0.277794093 | 0.435542191 |
| C97  | C | 0.000567988 | 0.731032572 | 0.672814033 | H67 | H | 0.250370755 | 0.977521184 | 0.864544852 |
| C98  | C | 0.233532062 | 0.492681012 | 0.22056426  | H68 | H | 0.260093754 | 0.906814359 | 0.563972796 |
| C99  | C | 0.298178673 | 0.280197079 | 0.306607153 | H69 | H | 0.889116121 | 0.199012528 | 0.595681932 |
| C100 | C | 0.642507924 | 0.824193983 | 0.437190949 | H70 | H | 0.350695822 | 0.719747426 | 0.569437177 |
| C101 | C | 0.887050117 | 0.706259354 | 0.530940299 | H71 | H | 0.680514115 | 0.653002024 | 0.90202549  |
| C102 | C | 0.858712522 | 0.759635145 | 0.21888452  | H72 | H | 0.33082441  | 0.476853798 | 0.12381167  |
| C103 | C | 0.843999552 | 0.482082403 | 0.109384656 | H73 | H | 0.07038993  | 0.855882781 | 0.299430278 |
| C104 | C | 0.307477208 | 0.378528657 | 0.204679206 | H74 | H | 0.153718886 | 0.493100642 | 0.437852174 |
| C105 | C | 0.271663942 | 0.145011977 | 0.335124555 | H75 | H | 0.599739806 | 0.293752803 | 0.781811516 |
| H1   | H | 0.483911688 | 0.910177369 | 0.570947641 | H76 | H | 0.989523223 | 0.467900636 | 0.706056079 |
| H2   | H | 0.444566267 | 0.420273912 | 0.22001388  | H77 | H | 0.636775436 | 0.706919669 | 0.997865204 |
| H3   | H | 0.258779006 | 0.547717332 | 0.5286521   | H78 | H | 0.556182485 | 0.208028233 | 0.703035408 |
| H4   | H | 0.054241632 | 0.010457587 | 0.142488371 | H79 | H | 0.252132109 | 0.56011469  | 0.631367469 |
| H5   | H | 0.600511384 | 0.067454344 | 0.659003468 | H80 | H | 0.861286942 | 0.894723784 | 0.958376885 |
| H6   | H | 0.425546482 | 0.487708935 | 0.603906793 | H81 | H | 0.082778337 | 0.965502884 | 0.926500357 |
| H7   | H | 0.088278307 | 0.869052903 | 0.367491528 | H82 | H | 0.247392483 | 0.768603547 | 0.701939269 |
| H8   | H | 0.931185122 | 0.397608958 | 0.763652543 | H83 | H | 0.548697522 | 0.519602125 | 0.666629179 |
| H9   | H | 0.362613768 | 0.428203391 | 0.292461678 | H84 | H | 0.533052051 | 0.548075294 | 0.471658735 |

|      |   |             |             |             |      |   |             |             |             |
|------|---|-------------|-------------|-------------|------|---|-------------|-------------|-------------|
| H85  | H | 0.946853429 | 0.138931164 | 0.371909616 | H160 | H | 0.880199844 | 0.683787929 | 0.511279013 |
| H86  | H | 0.459150911 | 0.523694655 | 0.455115662 | H161 | H | 0.447403727 | 0.931374627 | 0.874003054 |
| H87  | H | 0.007778388 | 0.105058493 | 0.803043813 | H162 | H | 0.539065356 | 0.819943229 | 0.74948614  |
| H88  | H | 0.200153406 | 0.457096358 | 0.672100759 | H163 | H | 0.967076645 | 0.00741393  | 0.879059037 |
| H89  | H | 0.279547499 | 0.368070012 | 0.206473619 | H164 | H | 0.709274193 | 0.349619156 | 0.563115564 |
| H90  | H | 0.362313953 | 0.163549741 | 0.303177988 | H165 | H | 0.641812035 | 0.733829968 | 0.218101131 |
| H91  | H | 0.155819471 | 0.010712396 | 0.393659306 | H166 | H | 0.001382103 | 0.915093715 | 0.217764331 |
| H92  | H | 0.923586528 | 0.418330865 | 0.066929639 | H167 | H | 0.792165802 | 0.672479488 | 0.322259322 |
| H93  | H | 0.060835757 | 0.371553009 | 0.034995857 | H168 | H | 0.570757959 | 0.53865283  | 0.437587326 |
| H94  | H | 0.541258571 | 0.214202895 | 0.309465481 | H169 | H | 0.595737975 | 0.661707291 | 0.840306424 |
| H95  | H | 0.209706905 | 0.022441618 | 0.806781894 | H170 | H | 0.580548468 | 0.705130273 | 0.498606476 |
| H96  | H | 0.507913994 | 0.019126492 | 0.511291855 | H171 | H | 0.889643711 | 0.829216074 | 0.459338762 |
| H97  | H | 0.242930974 | 0.498331675 | 0.834678445 | H172 | H | 0.843937924 | 0.495384519 | 0.076907757 |
| H98  | H | 0.605611497 | 0.266750319 | 0.348362892 | H173 | H | 0.729897882 | 0.067634221 | 0.312870908 |
| H99  | H | 0.226779801 | 0.595567617 | 0.665741372 | H174 | H | 0.082844474 | 0.735457939 | 0.81544313  |
| H100 | H | 0.799570903 | 0.818528445 | 0.51631272  | H175 | H | 0.714709128 | 0.755930906 | 0.389597502 |
| H101 | H | 0.96983228  | 0.588919733 | 0.726916853 | H176 | H | 0.457153301 | 0.884850957 | 0.3411005   |
| H102 | H | 0.488761541 | 0.589345915 | 0.409997999 | H177 | H | 0.35325583  | 0.302636721 | 0.183768398 |
| H103 | H | 0.005806196 | 0.090641345 | 0.060060767 | H178 | H | 0.137214565 | 0.360043322 | 0.422193104 |
| H104 | H | 0.552743556 | 0.898697529 | 0.658553324 | H179 | H | 0.761132456 | 0.056172773 | 0.713157749 |
| H105 | H | 0.661473902 | 0.527597782 | 0.29474064  | H180 | H | 0.780880004 | 0.650100013 | 0.123900503 |
| H106 | H | 0.961417959 | 0.863327104 | 0.907364862 | H181 | H | 0.094274179 | 0.865545389 | 0.264286227 |
| H107 | H | 0.970136801 | 0.509112277 | 0.475741476 | H182 | H | 0.717694633 | 0.968615982 | 0.976347068 |
| H108 | H | 0.032435187 | 0.79770529  | 0.450356128 | H183 | H | 0.533711709 | 0.943314016 | 0.094198118 |
| H109 | H | 0.858208274 | 0.612264538 | 0.921822422 | H184 | H | 0.17362273  | 0.890123057 | 0.383613561 |
| H110 | H | 0.675125427 | 0.625623025 | 0.94733118  | H185 | H | 0.021519016 | 0.718162032 | 0.652681227 |
| H111 | H | 0.476555645 | 0.585509952 | 0.347400376 | H186 | H | 0.719686338 | 0.773165879 | 0.598648364 |
| H112 | H | 0.185195301 | 0.010554486 | 0.467080496 | H187 | H | 0.215744546 | 0.958012179 | 0.942679861 |
| H113 | H | 0.79466028  | 0.923333258 | 0.896223278 | H188 | H | 0.331445373 | 0.724737786 | 0.389788598 |
| H114 | H | 0.051820217 | 0.471501067 | 0.413387778 | H189 | H | 0.711897676 | 0.506106869 | 0.291749429 |
| H115 | H | 0.957305764 | 0.69445171  | 0.020504224 | H190 | H | 0.29350631  | 0.559693803 | 0.106349358 |
| H116 | H | 0.710802527 | 0.806283802 | 0.469352028 | H191 | H | 0.48762109  | 0.473444364 | 0.674365196 |
| H117 | H | 0.813428232 | 0.859274494 | 0.578260329 | H192 | H | 0.592683194 | 0.352887121 | 0.682424173 |
| H118 | H | 0.510159375 | 0.091921656 | 0.635515692 | H193 | H | 0.59957538  | 0.380783227 | 0.365551924 |
| H119 | H | 0.649276739 | 0.128833486 | 0.002862853 | H194 | H | 0.363959307 | 0.993795435 | 0.583708256 |
| H120 | H | 0.45504312  | 0.497323082 | 0.368569577 | H195 | H | 0.28348482  | 0.30867091  | 0.319298637 |
| H121 | H | 0.451149074 | 0.778138311 | 0.58812831  | H196 | H | 0.518195702 | 0.526647181 | 0.015311495 |
| H122 | H | 0.624947389 | 0.194662257 | 0.648467783 | H197 | H | 0.713164306 | 0.162660876 | 0.353604534 |
| H123 | H | 0.435306158 | 0.928817361 | 0.695994149 | H198 | H | 0.169439983 | 0.628121285 | 0.91979239  |
| H124 | H | 0.874002254 | 0.141305292 | 0.355474422 | H199 | H | 0.500577786 | 0.666621712 | 0.224191777 |
| H125 | H | 0.918156244 | 0.875652779 | 0.695464407 | H200 | H | 0.9408117   | 0.439397637 | 0.792916804 |
| H126 | H | 0.267411367 | 0.740543739 | 0.802833077 | H201 | H | 0.842484369 | 0.820974898 | 0.476350014 |
| H127 | H | 0.891413223 | 0.193198844 | 0.029928255 | H202 | H | 0.892726725 | 0.646919796 | 0.865272163 |
| H128 | H | 0.142825863 | 0.663341012 | 0.091748905 | H203 | H | 0.532619292 | 0.424521804 | 0.668419664 |
| H129 | H | 0.828271533 | 0.713426047 | 0.332437357 | H204 | H | 0.001219468 | 0.491339178 | 0.539630965 |
| H130 | H | 0.79646102  | 0.099821946 | 0.432867381 | H205 | H | 0.010602985 | 0.682317546 | 0.726622732 |
| H131 | H | 0.984717398 | 0.290912273 | 0.275637255 | H206 | H | 0.082498332 | 0.738943875 | 0.516523302 |
| H132 | H | 0.58618632  | 0.684450812 | 0.00483864  | H207 | H | 0.938020455 | 0.819825496 | 0.433103404 |
| H133 | H | 0.701099966 | 0.965118129 | 0.321506713 | H208 | H | 0.61397012  | 0.49289912  | 0.766787164 |
| H134 | H | 0.891717521 | 0.654756526 | 0.159238881 | H209 | H | 0.061837407 | 0.475215105 | 0.765478269 |
| H135 | H | 0.272819896 | 0.201502083 | 0.132480644 | H210 | H | 0.814345915 | 0.413466054 | 0.638235382 |
| H136 | H | 0.455465467 | 0.40904924  | 0.4175839   | H211 | H | 0.117430576 | 0.496281625 | 0.186155575 |
| H137 | H | 0.745591464 | 0.014056847 | 0.974856237 | H212 | H | 0.188636185 | 0.822071901 | 0.646624892 |
| H138 | H | 0.26471618  | 0.418864273 | 0.140332141 | H213 | H | 0.055685768 | 0.769398691 | 0.742298681 |
| H139 | H | 0.536112533 | 0.779045868 | 0.653966883 | H214 | H | 0.87643483  | 0.105271439 | 0.320708573 |
| H140 | H | 0.216552488 | 0.49328443  | 0.150714532 | H215 | H | 0.181720614 | 0.979023948 | 0.796328409 |
| H141 | H | 0.789032443 | 0.807261884 | 0.463785127 | H216 | H | 0.68717655  | 0.473362478 | 0.670954093 |
| H142 | H | 0.031873762 | 0.746366034 | 0.818588868 | H217 | H | 0.440899735 | 0.568990771 | 0.432919841 |
| H143 | H | 0.66159816  | 0.796980319 | 0.345326281 | H218 | H | 0.118785846 | 0.139061721 | 0.14785856  |
| H144 | H | 0.186118624 | 0.149734825 | 0.19232185  | H219 | H | 0.556127514 | 0.681329275 | 0.70870268  |
| H145 | H | 0.488969244 | 0.459435329 | 0.129804272 | H220 | H | 0.916143008 | 0.266987484 | 0.699916183 |
| H146 | H | 0.019170903 | 0.397586481 | 0.422731507 | H221 | H | 0.998632502 | 0.245417183 | 0.777738184 |
| H147 | H | 0.912280064 | 0.543126101 | 0.435919266 | H222 | H | 0.033398434 | 0.179204612 | 0.326277796 |
| H148 | H | 0.42916557  | 0.729467383 | 0.299511222 | H223 | H | 0.291635901 | 0.601649765 | 0.4334095   |
| H149 | H | 0.960415771 | 0.151321714 | 0.676951392 | H224 | H | 0.791410649 | 0.907789713 | 0.824537607 |
| H150 | H | 0.024134129 | 0.424059388 | 0.474464431 | H225 | H | 0.252564967 | 0.55340539  | 0.777653187 |
| H151 | H | 0.851134293 | 0.996228063 | 0.314291068 | H226 | H | 0.268874387 | 0.661704187 | 0.678914752 |
| H152 | H | 0.212764998 | 0.653488808 | 0.304499148 | H227 | H | 0.145168505 | 0.027760633 | 0.92631779  |
| H153 | H | 0.858420496 | 0.408571625 | 0.515295207 | H228 | H | 0.017855055 | 0.653370472 | 0.107999508 |
| H154 | H | 0.045324377 | 0.659224119 | 0.565170434 | H229 | H | 0.18367269  | 0.470611662 | 0.724340929 |
| H155 | H | 0.873209158 | 0.771306631 | 0.366881385 | H230 | H | 0.852891373 | 0.620746835 | 0.172861843 |
| H156 | H | 0.225823561 | 0.530756293 | 0.657983201 | H231 | H | 0.074301123 | 0.346056922 | 0.817654237 |
| H157 | H | 0.025757363 | 0.43617928  | 0.689779219 | H232 | H | 0.678566503 | 0.843671236 | 0.203401837 |
| H158 | H | 0.873172926 | 0.192328011 | 0.103277767 | H233 | H | 0.877298705 | 0.595019237 | 0.232116581 |
| H159 | H | 0.654358596 | 0.075182039 | 0.386967063 | H234 | H | 0.618270167 | 0.802563349 | 0.772975093 |

|      |   |             |             |             |      |   |             |             |             |
|------|---|-------------|-------------|-------------|------|---|-------------|-------------|-------------|
| H235 | H | 0.317461583 | 0.455761186 | 0.81873272  | H310 | H | 0.782103705 | 0.455480286 | 0.357680067 |
| H236 | H | 0.577854156 | 0.132774429 | 0.340233198 | H311 | H | 0.293122594 | 0.59513029  | 0.619896551 |
| H237 | H | 0.579196681 | 0.447182612 | 0.829485328 | H312 | H | 0.387280999 | 0.387748743 | 0.384474786 |
| H238 | H | 0.837868156 | 0.086204259 | 0.046634421 | H313 | H | 0.963151106 | 0.451320542 | 0.396836796 |
| H239 | H | 0.570916277 | 0.631722469 | 0.179214666 | H314 | H | 0.449015905 | 0.708787385 | 0.495907018 |
| H240 | H | 0.213966491 | 0.067728559 | 0.334119172 | H315 | H | 0.996735571 | 0.074415631 | 0.255665441 |
| H241 | H | 0.30311134  | 0.691021311 | 0.863097262 | H316 | H | 0.014504523 | 0.90452589  | 0.373412797 |
| H242 | H | 0.447662206 | 0.958078914 | 0.800460163 | H317 | H | 0.923017516 | 0.518522383 | 0.029997814 |
| H243 | H | 0.274784552 | 0.133498325 | 0.053306259 | H318 | H | 0.865551969 | 0.537369732 | 0.970367529 |
| H244 | H | 0.691156065 | 0.891969462 | 0.618867918 | H319 | H | 0.949099958 | 0.284308697 | 0.379986161 |
| H245 | H | 0.335203784 | 0.446427865 | 0.196348317 | H320 | H | 0.279614381 | 0.233556922 | 0.362634149 |
| H246 | H | 0.501794498 | 0.67448286  | 0.020955646 | H321 | H | 0.689322697 | 0.12508531  | 0.633892193 |
| H247 | H | 0.492374645 | 0.652239503 | 0.398099397 | H322 | H | 0.15066237  | 0.843256852 | 0.409036039 |
| H248 | H | 0.103789316 | 0.525461166 | 0.339819669 | H323 | H | 0.628499755 | 0.605215476 | 0.06352693  |
| H249 | H | 0.97319107  | 0.89530547  | 0.298486408 | H324 | H | 0.167867779 | 0.388703032 | 0.740410731 |
| H250 | H | 0.856258059 | 0.588090454 | 0.503644229 | H325 | H | 0.622593018 | 0.796462881 | 0.44845222  |
| H251 | H | 0.68413747  | 0.928297425 | 0.852108205 | H326 | H | 0.796428047 | 0.156381633 | 0.051191647 |
| H252 | H | 0.106493153 | 0.72049069  | 0.700544298 | H327 | H | 0.59442188  | 0.530581944 | 0.914028239 |
| H253 | H | 0.083251073 | 0.001551184 | 0.880746611 | H328 | H | 0.604846792 | 0.858930116 | 0.760592275 |
| H254 | H | 0.935693838 | 0.396533031 | 0.470167496 | H329 | H | 0.08670606  | 0.145429411 | 0.025950519 |
| H255 | H | 0.5002579   | 0.410883482 | 0.28549954  | H330 | H | 0.02467638  | 0.57063835  | 0.304640409 |
| H256 | H | 0.940155494 | 0.750192206 | 0.475423613 | H331 | H | 0.091117209 | 0.332303065 | 0.631760312 |
| H257 | H | 0.532254868 | 0.055795404 | 0.549937192 | H332 | H | 0.335443706 | 0.376388431 | 0.887682482 |
| H258 | H | 0.648051445 | 0.842330275 | 0.322674441 | H333 | H | 0.509575025 | 0.004592147 | 0.944408671 |
| H259 | H | 0.211186762 | 0.684708257 | 0.598959422 | H334 | H | 0.109412521 | 0.594344419 | 0.79283012  |
| H260 | H | 0.298192551 | 0.123187806 | 0.344600305 | H335 | H | 0.885932601 | 0.278371936 | 0.202676818 |
| H261 | H | 0.188505092 | 0.532829368 | 0.101825758 | H336 | H | 0.563236021 | 0.649665499 | 0.236896335 |
| H262 | H | 0.852034459 | 0.053828773 | 0.37807521  | H337 | H | 0.227631488 | 0.583773364 | 0.041102118 |
| H263 | H | 0.931714956 | 0.002017126 | 0.379375258 | H338 | H | 0.814548403 | 0.465402085 | 0.113616968 |
| H264 | H | 0.082568223 | 0.631072066 | 0.734267095 | H339 | H | 0.517978715 | 0.242431782 | 0.354713449 |
| H265 | H | 0.322219722 | 0.580892339 | 0.686452006 | H340 | H | 0.142594652 | 0.554805863 | 0.689348784 |
| H266 | H | 0.023306437 | 0.249845169 | 0.073965166 | H341 | H | 0.104086322 | 0.95007702  | 0.878681233 |
| H267 | H | 0.867416987 | 0.820211298 | 0.297101744 | H342 | H | 0.737521479 | 0.982485463 | 0.781711614 |
| H268 | H | 0.129997537 | 0.503745492 | 0.491928376 | H343 | H | 0.905627374 | 0.496988996 | 0.407985493 |
| H269 | H | 0.263008782 | 0.623150613 | 0.506832223 | H344 | H | 0.679035288 | 0.028536999 | 0.201539131 |
| H270 | H | 0.512812386 | 0.661211883 | 0.661331298 | H345 | H | 0.655200982 | 0.064175715 | 0.174737695 |
| H271 | H | 0.171120164 | 0.840349296 | 0.144264513 | H346 | H | 0.248780437 | 0.129223895 | 0.318184921 |
| H272 | H | 0.25283977  | 0.147531642 | 0.816359395 | H347 | H | 0.590285008 | 0.301892285 | 0.557424925 |
| H273 | H | 0.952552987 | 0.305924805 | 0.606461456 | H348 | H | 0.135909302 | 0.504820307 | 0.322668244 |
| H274 | H | 0.140451794 | 0.829570547 | 0.25672833  | H349 | H | 0.16139988  | 0.015028287 | 0.203459795 |
| H275 | H | 0.687619315 | 0.152347455 | 0.111047198 | H350 | H | 0.988277592 | 0.129452949 | 0.264219203 |
| H276 | H | 0.202220364 | 0.33469016  | 0.382688211 | H351 | H | 0.955661731 | 0.812406125 | 0.639172663 |
| H277 | H | 0.170238701 | 0.96414329  | 0.869148675 | H352 | H | 0.944538829 | 0.047021045 | 0.382338834 |
| H278 | H | 0.169065282 | 0.57884129  | 0.406077766 | H353 | H | 0.689359692 | 0.260481968 | 0.354178824 |
| H279 | H | 0.532851391 | 0.306235399 | 0.214495032 | H354 | H | 0.721300156 | 0.986945244 | 0.331189579 |
| H280 | H | 0.803877713 | 0.941588423 | 0.940702798 | H355 | H | 0.94542148  | 0.406256801 | 0.30717587  |
| H281 | H | 0.57746333  | 0.955552375 | 0.398677164 | H356 | H | 0.623669246 | 0.837094498 | 0.65971238  |
| H282 | H | 0.198148346 | 0.14558558  | 0.07744173  | H357 | H | 0.943601062 | 0.202408165 | 0.306611617 |
| H283 | H | 0.912554802 | 0.465185164 | 0.126161539 | H358 | H | 0.415274187 | 0.987179358 | 0.601504745 |
| H284 | H | 0.265349313 | 0.719566155 | 0.463334886 | H359 | H | 0.625364296 | 0.586061198 | 0.709624736 |
| H285 | H | 0.003839006 | 0.764683374 | 0.669351065 | H360 | H | 0.201580194 | 0.209680026 | 0.190112658 |
| H286 | H | 0.041417416 | 0.596977373 | 0.608649527 | H361 | H | 0.758929205 | 0.083820415 | 0.117890641 |
| H287 | H | 0.049487527 | 0.861896083 | 0.176711852 | H362 | H | 0.393662205 | 0.530204503 | 0.071624034 |
| H288 | H | 0.950635094 | 0.608539949 | 0.044961647 | H363 | H | 0.697051249 | 0.288326516 | 0.089278749 |
| H289 | H | 0.244567963 | 0.483618139 | 0.328647602 | H364 | H | 0.641033222 | 0.20521521  | 0.324972915 |
| H290 | H | 0.729956429 | 0.104083164 | 0.158675972 | H365 | H | 0.040573532 | 0.515824714 | 0.739905509 |
| H291 | H | 0.642284909 | 0.846111724 | 0.46123142  | H366 | H | 0.472883247 | 0.289226925 | 0.855631387 |
| H292 | H | 0.339030584 | 0.089542344 | 0.264963232 | H367 | H | 0.30581251  | 0.540876705 | 0.775871976 |
| H293 | H | 0.461800358 | 0.05531661  | 0.720183699 | H368 | H | 0.56025677  | 0.431524219 | 0.03871206  |
| H294 | H | 0.349368199 | 0.013077862 | 0.187569172 | H369 | H | 0.507735018 | 0.356368426 | 0.718460015 |
| H295 | H | 0.604475865 | 0.232510932 | 0.715627579 | H370 | H | 0.665657485 | 0.695980477 | 0.732997226 |
| H296 | H | 0.968100988 | 0.761611526 | 0.247037133 | H371 | H | 0.704911945 | 0.076619664 | 0.126698459 |
| H297 | H | 0.407099959 | 0.500504659 | 0.394070214 | H372 | H | 0.528938254 | 0.162186742 | 0.693772605 |
| H298 | H | 0.87659881  | 0.156433041 | 0.305257726 | H373 | H | 0.014020973 | 0.229041772 | 0.319667035 |
| H299 | H | 0.047281508 | 0.041828372 | 0.835474593 | H374 | H | 0.550310729 | 0.76003289  | 0.63309042  |
| H300 | H | 0.320992833 | 0.369823315 | 0.229600371 | H375 | H | 0.225479082 | 0.437380617 | 0.514134028 |
| H301 | H | 0.674074883 | 0.71791976  | 0.962011095 | H376 | H | 0.918570355 | 0.039614558 | 0.417854521 |
| H302 | H | 0.547230555 | 0.757998606 | 0.841185533 | H377 | H | 0.278358476 | 0.598975392 | 0.340484241 |
| H303 | H | 0.121950711 | 0.280062815 | 0.273370311 | H378 | H | 0.843901156 | 0.844232684 | 0.730918668 |
| H304 | H | 0.44222022  | 0.839750133 | 0.834417869 | H379 | H | 0.451038738 | 0.56968756  | 0.619524001 |
| H305 | H | 0.728279425 | 0.446701495 | 0.459302829 | H380 | H | 0.582009243 | 0.625864856 | 0.884535317 |
| H306 | H | 0.805395237 | 0.211326998 | 0.058452014 | H381 | H | 0.070964673 | 0.810365237 | 0.324546981 |
| H307 | H | 0.907837672 | 0.497203083 | 0.889310996 | H382 | H | 0.877411704 | 0.503995932 | 0.457117238 |
| H308 | H | 0.590624056 | 0.838658779 | 0.384604508 | H383 | H | 0.234522867 | 0.403412516 | 0.62444021  |
| H309 | H | 0.976079538 | 0.352296175 | 0.736819626 | H384 | H | 0.836766    | 0.38204186  | 0.058022692 |

|      |   |             |             |             |      |   |             |             |             |
|------|---|-------------|-------------|-------------|------|---|-------------|-------------|-------------|
| H385 | H | 0.634098603 | 0.283601899 | 0.459805213 | H460 | H | 0.859731306 | 0.381978498 | 0.235503002 |
| H386 | H | 0.290187312 | 0.515724431 | 0.133077608 | H461 | H | 0.096050827 | 0.720603662 | 0.362083347 |
| H387 | H | 0.854133804 | 0.224775199 | 0.982540537 | H462 | H | 0.640693614 | 0.078182779 | 0.314182559 |
| H388 | H | 0.504008952 | 0.169977824 | 0.647906128 | H463 | H | 0.658578802 | 0.730279507 | 0.443148519 |
| H389 | H | 0.883773379 | 0.444370949 | 0.041524971 | H464 | H | 0.029195643 | 0.596897919 | 0.502227458 |
| H390 | H | 0.245757585 | 0.339634653 | 0.46938599  | H465 | H | 0.636733121 | 0.592687662 | 0.5897457   |
| H391 | H | 0.287434715 | 0.318720348 | 0.452951776 | H466 | H | 0.548296425 | 0.624533775 | 0.926999186 |
| H392 | H | 0.099713571 | 0.768438863 | 0.392211875 | H467 | H | 0.322441304 | 0.232324628 | 0.461151521 |
| H393 | H | 0.923048587 | 0.429057016 | 0.931533687 | H468 | H | 0.276995139 | 0.782012736 | 0.090891049 |
| H394 | H | 0.181600271 | 0.835545178 | 0.361253086 | H469 | H | 0.855409295 | 0.388085118 | 0.139360664 |
| H395 | H | 0.797558593 | 0.32056599  | 0.689075329 | H470 | H | 0.472632834 | 0.558032633 | 0.09725317  |
| H396 | H | 0.823593783 | 0.985375507 | 0.872831126 | H471 | H | 0.824725178 | 0.70746612  | 0.897230159 |
| H397 | H | 0.745397147 | 0.001697053 | 0.405578916 | H472 | H | 0.593591854 | 0.590716575 | 0.92345375  |
| H398 | H | 0.257492884 | 0.663361542 | 0.157611451 | H473 | H | 0.161828314 | 0.974231462 | 0.932491831 |
| H399 | H | 0.590060803 | 0.182803943 | 0.740226536 | H474 | H | 0.086633754 | 0.814013983 | 0.248222829 |
| H400 | H | 0.957679456 | 0.774961795 | 0.815326445 | H475 | H | 0.808551665 | 0.850289414 | 0.891869729 |
| H401 | H | 0.33733048  | 0.227293647 | 0.097386374 | H476 | H | 0.556214056 | 0.540173609 | 0.255449473 |
| H402 | H | 0.680699879 | 0.694063207 | 0.995227372 | H477 | H | 0.581371447 | 0.17418846  | 0.567732641 |
| H403 | H | 0.018800733 | 0.363258996 | 0.66975169  | H478 | H | 0.929610899 | 0.094314133 | 0.97829627  |
| H404 | H | 0.260773429 | 0.156375565 | 0.361216742 | H479 | H | 0.543379214 | 0.404836363 | 0.717821853 |
| H405 | H | 0.139617399 | 0.672508625 | 0.020474922 | H480 | H | 0.353258516 | 0.579009218 | 0.176566655 |
| H406 | H | 0.28993811  | 0.497767    | 0.717191697 | H481 | H | 0.847072781 | 0.502921215 | 0.130512478 |
| H407 | H | 0.30133006  | 0.658330538 | 0.163405575 | H482 | H | 0.61008776  | 0.469369986 | 0.683576233 |
| H408 | H | 0.017656404 | 0.423362969 | 0.781244291 | H483 | H | 0.226942321 | 0.305377592 | 0.267012108 |
| H409 | H | 0.26476748  | 0.978453312 | 0.947268871 | H484 | H | 0.573496422 | 0.272780799 | 0.420315349 |
| H410 | H | 0.632586531 | 0.717835464 | 0.344530997 | H485 | H | 0.865538964 | 0.758598341 | 0.61067318  |
| H411 | H | 0.384127556 | 0.187102345 | 0.373707453 | H486 | H | 0.055453499 | 0.415732441 | 0.930952216 |
| H412 | H | 0.726729906 | 0.099667805 | 0.03879398  | H487 | H | 0.548512882 | 0.531204904 | 0.721861783 |
| H413 | H | 0.553519367 | 0.962452712 | 0.524484993 | H488 | H | 0.297978667 | 0.928538706 | 0.010228776 |
| H414 | H | 0.627506874 | 0.976219309 | 0.995974437 | H489 | H | 0.303342416 | 0.441687894 | 0.697289937 |
| H415 | H | 0.174925385 | 0.683134107 | 0.843991368 | H490 | H | 0.160749423 | 0.634398573 | 0.970764208 |
| H416 | H | 0.92347644  | 0.368226574 | 0.167238374 | H491 | H | 0.435668887 | 0.589246406 | 0.972851594 |
| H417 | H | 0.52897601  | 0.973070047 | 0.762386405 | H492 | H | 0.714370606 | 0.394820496 | 0.790412243 |
| H418 | H | 0.862525645 | 0.367375196 | 0.104411737 | H493 | H | 0.906864238 | 0.390415408 | 0.214150685 |
| H419 | H | 0.651615987 | 0.91177347  | 0.376049279 | H494 | H | 0.334437354 | 0.318051005 | 0.828706934 |
| H420 | H | 0.076335695 | 0.688941372 | 0.443481369 | H495 | H | 0.642351828 | 0.907925029 | 0.429035264 |
| H421 | H | 0.702967614 | 0.932433502 | 0.344390199 | H496 | H | 0.017439047 | 0.503443805 | 0.377861388 |
| H422 | H | 0.431148137 | 0.327307705 | 0.329418409 | H497 | H | 0.697070006 | 0.538749096 | 0.224024434 |
| H423 | H | 0.506827132 | 0.85705183  | 0.469748456 | H498 | H | 0.529909676 | 0.347376357 | 0.535147535 |
| H424 | H | 0.883227764 | 0.779722459 | 0.532973944 | H499 | H | 0.84529139  | 0.70990868  | 0.148890595 |
| H425 | H | 0.229973969 | 0.223132637 | 0.883855477 | H500 | H | 0.674053903 | 0.252716881 | 0.75656277  |
| H426 | H | 0.934598745 | 0.828985911 | 0.486249726 | H501 | H | 0.641140643 | 0.134265016 | 0.056146938 |
| H427 | H | 0.287939108 | 0.186308277 | 0.272915147 | H502 | H | 0.880035972 | 0.329657439 | 0.271007192 |
| H428 | H | 0.258601986 | 0.602402473 | 0.240745207 | H503 | H | 0.545006815 | 0.641684815 | 0.387001794 |
| H429 | H | 0.090140667 | 0.57140248  | 0.155199418 | H504 | H | 0.023405289 | 0.516316949 | 0.434594444 |
| H430 | H | 0.727331046 | 0.502491966 | 0.353709045 | H505 | H | 0.828396489 | 0.547029867 | 0.286876361 |
| H431 | H | 0.324745103 | 0.363104119 | 0.176959332 | H506 | H | 0.714280963 | 0.697568672 | 0.938297029 |
| H432 | H | 0.732694187 | 0.83176339  | 0.344706049 | H507 | H | 0.574073809 | 0.117106751 | 0.624782741 |
| H433 | H | 0.597279207 | 0.842652339 | 0.895665841 | H508 | H | 0.142582052 | 0.629881103 | 0.199077593 |
| H434 | H | 0.812409318 | 0.288565167 | 0.777078695 | H509 | H | 0.391671907 | 0.392794717 | 0.720774395 |
| H435 | H | 0.837290224 | 0.83229262  | 0.127194227 | H510 | H | 0.335621589 | 0.20766628  | 0.384002455 |
| H436 | H | 0.049382631 | 0.866697975 | 0.972080168 | H511 | H | 0.198983498 | 0.755374696 | 0.543988756 |
| H437 | H | 0.558371963 | 0.741770223 | 0.950531223 | H512 | H | 0.558296206 | 0.220514864 | 0.420076595 |
| H438 | H | 0.63410459  | 0.183783798 | 0.375025841 | H513 | H | 0.42328582  | 0.540467977 | 0.361175617 |
| H439 | H | 0.885545148 | 0.752554688 | 0.197937997 | H514 | H | 0.716082099 | 0.864818379 | 0.386311846 |
| H440 | H | 0.588404586 | 0.824114659 | 0.620465927 | H515 | H | 0.050846876 | 0.656879839 | 0.695633388 |
| H441 | H | 0.782790658 | 0.568534188 | 0.444023954 | H516 | H | 0.389407918 | 0.828802629 | 0.560579894 |
| H442 | H | 0.427373047 | 0.476245784 | 0.966640269 | H517 | H | 0.980489738 | 0.722859972 | 0.746665347 |
| H443 | H | 0.211496211 | 0.518368324 | 0.226433369 | H518 | H | 0.941717845 | 0.850534799 | 0.831265284 |
| H444 | H | 0.930369175 | 0.269985314 | 0.046671262 | H519 | H | 0.558611499 | 0.775453809 | 0.725963776 |
| H445 | H | 0.547414516 | 0.470370765 | 0.334587713 | H520 | H | 0.671022577 | 0.814590324 | 0.435163454 |
| H446 | H | 0.936544178 | 0.42235721  | 0.179613051 | H521 | H | 0.187628322 | 0.256937554 | 0.445650022 |
| H447 | H | 0.509613211 | 0.895941752 | 0.690880557 | H522 | H | 0.862310308 | 0.954690191 | 0.876030918 |
| H448 | H | 0.57373829  | 0.922339154 | 0.352676362 | H523 | H | 0.792185024 | 0.454104653 | 0.781251341 |
| H449 | H | 0.153218762 | 0.024400729 | 0.805321479 | H524 | H | 0.973319219 | 0.173214129 | 0.277020627 |
| H450 | H | 0.524988192 | 0.404334318 | 0.925534817 | H525 | H | 0.291935677 | 0.295401125 | 0.469948617 |
| H451 | H | 0.56779535  | 0.211830637 | 0.596637196 | H526 | H | 0.253389465 | 0.21470402  | 0.625076013 |
| H452 | H | 0.030913796 | 0.09974594  | 0.287598191 | H527 | H | 0.542646507 | 0.310167431 | 0.322398088 |
| H453 | H | 0.559535743 | 0.905046455 | 0.398115466 | H528 | H | 0.516149526 | 0.284983004 | 0.284688707 |
| H454 | H | 0.290971909 | 0.450288839 | 0.224577704 | H529 | H | 0.052320832 | 0.609412009 | 0.244318447 |
| H455 | H | 0.39219216  | 0.850764414 | 0.659753963 | H530 | H | 0.183069273 | 0.643643742 | 0.518321933 |
| H456 | H | 0.082615063 | 0.4901647   | 0.714624527 | H531 | H | 0.648813474 | 0.339938163 | 0.143165086 |
| H457 | H | 0.879799669 | 0.987532607 | 0.19524733  | H532 | H | 0.903049588 | 0.832674215 | 0.845429905 |
| H458 | H | 0.442881908 | 0.181954225 | 0.391612828 | H533 | H | 0.340199946 | 0.994954444 | 0.869466752 |
| H459 | H | 0.089788043 | 0.153851827 | 0.369744691 | H534 | H | 0.865916665 | 0.98425469  | 0.914900434 |

|      |   |             |             |             |      |   |             |             |             |
|------|---|-------------|-------------|-------------|------|---|-------------|-------------|-------------|
| H535 | H | 0.128409094 | 0.480480817 | 0.611507526 | H610 | H | 0.946130771 | 0.066542984 | 0.313491608 |
| H536 | H | 0.056300128 | 0.395218793 | 0.689405046 | H611 | H | 0.421369014 | 0.338085153 | 0.996934758 |
| H537 | H | 0.767255595 | 0.397778672 | 0.756870807 | H612 | H | 0.154150771 | 0.667476323 | 0.614381545 |
| H538 | H | 0.641913065 | 0.249603033 | 0.766239326 | H613 | H | 0.29679034  | 0.280264623 | 0.276987143 |
| H539 | H | 0.902430289 | 0.197753614 | 0.427647331 | H614 | H | 0.967982439 | 0.434748237 | 0.598553365 |
| H540 | H | 0.773568071 | 0.388990525 | 0.087951739 | H615 | H | 0.049886247 | 0.699007386 | 0.811990601 |
| H541 | H | 0.333507971 | 0.278049364 | 0.31422546  | H616 | H | 0.140998088 | 0.044088627 | 0.151964272 |
| H542 | H | 0.424686524 | 0.424695892 | 0.840070173 | H617 | H | 0.899103714 | 0.491774393 | 0.355889491 |
| H543 | H | 0.712112526 | 0.401272688 | 0.249635029 | H618 | H | 0.931348655 | 0.847686839 | 0.94964546  |
| H544 | H | 0.371077319 | 0.625453967 | 0.65668206  | H619 | H | 0.426216307 | 0.762367016 | 0.897211688 |
| H545 | H | 0.847419906 | 0.822720508 | 0.912305509 | H620 | H | 0.524749239 | 0.395785397 | 0.837490764 |
| H546 | H | 0.880416807 | 0.356937422 | 0.053620656 | H621 | H | 0.665916637 | 0.642048582 | 0.045829616 |
| H547 | H | 0.184562068 | 0.334047778 | 0.65539557  | H622 | H | 0.207600514 | 0.545934848 | 0.707973202 |
| H548 | H | 0.85363884  | 0.085395759 | 0.853629746 | H623 | H | 0.997577395 | 0.602544088 | 0.535949072 |
| H549 | H | 0.5112424   | 0.77861456  | 0.892026349 | H624 | H | 0.024281922 | 0.350273777 | 0.764034706 |
| H550 | H | 0.734810397 | 0.668669995 | 0.547726772 | H625 | H | 0.598356627 | 0.073601308 | 0.562919158 |
| H551 | H | 0.968518415 | 0.80254236  | 0.363793984 | H626 | H | 0.634988096 | 0.445529255 | 0.755374276 |
| H552 | H | 0.332528285 | 0.818337881 | 0.734188845 | H627 | H | 0.898349874 | 0.920484876 | 0.887891089 |
| H553 | H | 0.724999759 | 0.627625952 | 0.377120405 | H628 | H | 0.268199022 | 0.040839015 | 0.811042475 |
| H554 | H | 0.580688835 | 0.769246247 | 0.989177207 | H629 | H | 0.628802798 | 0.825043398 | 0.722131226 |
| H555 | H | 0.834435943 | 0.655077286 | 0.254223843 | H630 | H | 0.823665587 | 0.735354986 | 0.46747709  |
| H556 | H | 0.003328104 | 0.198909158 | 0.364491814 | H631 | H | 0.841871871 | 0.788821807 | 0.205259985 |
| H557 | H | 0.598729461 | 0.899548692 | 0.136208324 | H632 | H | 0.145180876 | 0.732991516 | 0.389473077 |
| H558 | H | 0.540579351 | 0.310672967 | 0.663455491 | H633 | H | 0.133463591 | 0.128498077 | 0.857149709 |
| H559 | H | 0.247823815 | 0.036468153 | 0.656002187 | H634 | H | 0.352750971 | 0.707153942 | 0.465787768 |
| H560 | H | 0.652813727 | 0.086366079 | 0.039353762 | H635 | H | 0.519723135 | 0.080731399 | 0.685819661 |
| H561 | H | 0.47164031  | 0.474373224 | 0.428988944 | H636 | H | 0.582608473 | 0.38119933  | 0.637112521 |
| H562 | H | 0.768980946 | 0.801250583 | 0.677976002 | H637 | H | 0.560997371 | 0.899208254 | 0.710125662 |
| H563 | H | 0.985001737 | 0.080320521 | 0.343438284 | H638 | H | 0.569315299 | 0.290915413 | 0.28306215  |
| H564 | H | 0.880796158 | 0.227799716 | 0.833916463 | H639 | H | 0.101899927 | 0.644182173 | 0.683822274 |
| H565 | H | 0.965521304 | 0.158189432 | 0.18821848  | H640 | H | 0.381306019 | 0.817294562 | 0.930515512 |
| H566 | H | 0.251359902 | 0.648816357 | 0.901597906 | H641 | H | 0.232674631 | 0.455940566 | 0.718612846 |
| H567 | H | 0.939563034 | 0.464687843 | 0.487614138 | H642 | H | 0.486063157 | 0.474954487 | 0.887778301 |
| H568 | H | 0.907979477 | 0.707722491 | 0.071940831 | H643 | H | 0.036489568 | 0.294225424 | 0.979200912 |
| H569 | H | 0.215993666 | 0.094678873 | 0.98232127  | H644 | H | 0.747687296 | 0.844065381 | 0.899157573 |
| H570 | H | 0.119398361 | 0.702770851 | 0.746952829 | H645 | H | 0.807258154 | 0.391638627 | 0.8760901   |
| H571 | H | 0.53559107  | 0.783018911 | 0.370841912 | H646 | H | 0.474485063 | 0.506626263 | 0.717489978 |
| H572 | H | 0.594370076 | 0.019010574 | 0.45015632  | H647 | H | 0.96358106  | 0.556953195 | 0.666830412 |
| H573 | H | 0.003037083 | 0.617804126 | 0.237847242 | H648 | H | 0.606820807 | 0.443790564 | 0.401860149 |
| H574 | H | 0.901426128 | 0.749292651 | 0.43961418  | H649 | H | 0.976500766 | 0.937050984 | 0.992415692 |
| H575 | H | 0.245615718 | 0.749987438 | 0.006042791 | H650 | H | 0.784730926 | 0.720089553 | 0.301339055 |
| H576 | H | 0.497462462 | 0.455903141 | 0.728240144 | H651 | H | 0.961461543 | 0.601880216 | 0.95840102  |
| H577 | H | 0.752280861 | 0.847897382 | 0.371187397 | H652 | H | 0.190280383 | 0.118568761 | 0.565132327 |
| H578 | H | 0.118547374 | 0.888636019 | 0.332160151 | H653 | H | 0.904605062 | 0.720290729 | 0.31160836  |
| H579 | H | 0.75741975  | 0.519975118 | 0.591752495 | H654 | H | 0.657193512 | 0.23471074  | 0.101872895 |
| H580 | H | 0.767554945 | 0.688211116 | 0.47260096  | H655 | H | 0.34956565  | 0.788719086 | 0.616983856 |
| H581 | H | 0.632784541 | 0.151855842 | 0.678055323 | H656 | H | 0.289615082 | 0.586251325 | 0.751806048 |
| H582 | H | 0.207920863 | 0.741388118 | 0.788519169 | H657 | H | 0.262082611 | 0.505411225 | 0.221502445 |
| H583 | H | 0.802267482 | 0.23803146  | 0.270349817 | H658 | H | 0.525508662 | 0.816449694 | 0.667035493 |
| H584 | H | 0.518356063 | 0.657053249 | 0.347663954 | H659 | H | 0.21477692  | 0.692534045 | 0.39485918  |
| H585 | H | 0.865874998 | 0.937300712 | 0.358091752 | H660 | H | 0.52833262  | 0.012228815 | 0.057173344 |
| H586 | H | 0.390572886 | 0.629240252 | 0.925852195 | H661 | H | 0.305226247 | 0.097586798 | 0.469206715 |
| H587 | H | 0.334261002 | 0.533129179 | 0.670450043 | H662 | H | 0.692596068 | 0.734234557 | 0.654584091 |
| H588 | H | 0.049841678 | 0.03657724  | 0.995414497 | H663 | H | 0.866141576 | 0.070600865 | 0.624823144 |
| H589 | H | 0.244796873 | 0.025874845 | 0.877810962 | H664 | H | 0.037857235 | 0.413544717 | 0.273640552 |
| H590 | H | 0.717771298 | 0.153949072 | 0.028343909 | H665 | H | 0.373141121 | 0.542009813 | 0.49379473  |
| H591 | H | 0.613459714 | 0.235846544 | 0.425884456 | H666 | H | 0.865987609 | 0.79868483  | 0.006284763 |
| H592 | H | 0.015956047 | 0.524117241 | 0.120201113 | H667 | H | 0.294416818 | 0.092212957 | 0.217054296 |
| H593 | H | 0.781450856 | 0.069453192 | 0.958538105 | H668 | H | 0.489070708 | 0.211150562 | 0.568750695 |
| H594 | H | 0.747213895 | 0.204612202 | 0.115259145 | H669 | H | 0.603883821 | 0.76219269  | 0.943425673 |
| H595 | H | 0.795603185 | 0.724474322 | 0.221360285 | H670 | H | 0.46802075  | 0.104879662 | 0.666764773 |
| H596 | H | 0.251103354 | 0.836664635 | 0.474992142 | H671 | H | 0.776857907 | 0.797947259 | 0.824300342 |
| H597 | H | 0.371300991 | 0.239786206 | 0.360071337 | H672 | H | 0.91921749  | 0.70345612  | 0.544000793 |
| H598 | H | 0.873131198 | 0.687051398 | 0.268085241 | H673 | H | 0.9679884   | 0.720383894 | 0.660866608 |
| H599 | H | 0.975602793 | 0.372328758 | 0.503079499 | H674 | H | 0.03673685  | 0.306783874 | 0.183585941 |
| H600 | H | 0.523854092 | 0.427777338 | 0.53626639  | H675 | H | 0.136460944 | 0.814708168 | 0.648082797 |
| H601 | H | 0.326300902 | 0.560247331 | 0.446165115 | H676 | H | 0.123665064 | 0.223722288 | 0.361899669 |
| H602 | H | 0.664021794 | 0.943085274 | 0.782751681 | H677 | H | 0.183873976 | 0.395957632 | 0.377233711 |
| H603 | H | 0.795360972 | 0.180455055 | 0.398782944 | H678 | H | 0.296206225 | 0.545784823 | 0.607216163 |
| H604 | H | 0.655612988 | 0.443868598 | 0.278957325 | H679 | H | 0.75520231  | 0.834552943 | 0.105898322 |
| H605 | H | 0.419770355 | 0.002195859 | 0.354432054 | H680 | H | 0.713946883 | 0.893109168 | 0.457521116 |
| H606 | H | 0.57605773  | 0.016012855 | 0.246424795 | H681 | H | 0.28419518  | 0.475274776 | 0.091447638 |
| H607 | H | 0.86705386  | 0.702062191 | 0.55696394  | H682 | H | 0.001668419 | 0.017842113 | 0.034755387 |
| H608 | H | 0.420470389 | 0.628776271 | 0.349600373 | H683 | H | 0.852296086 | 0.428912206 | 0.177449183 |
| H609 | H | 0.506731009 | 0.464630279 | 0.410907333 | H684 | H | 0.233340285 | 0.045523778 | 0.126675746 |

|      |   |             |             |             |      |   |             |             |             |
|------|---|-------------|-------------|-------------|------|---|-------------|-------------|-------------|
| H685 | H | 0.954524857 | 0.900893908 | 0.947136794 | H690 | H | 0.810340539 | 0.73925808  | 0.515604353 |
| H686 | H | 0.287920371 | 0.820053286 | 0.582261344 | H691 | H | 0.94444754  | 0.903239896 | 0.111585809 |
| H687 | H | 0.762443909 | 0.187954007 | 0.035556824 | H692 | H | 0.564038456 | 0.769281358 | 0.695924465 |
| H688 | H | 0.79731976  | 0.491412583 | 0.90109498  | H693 | H | 0.060266934 | 0.436393057 | 0.477037345 |
| H689 | H | 0.989749116 | 0.521138391 | 0.867440922 | #End |   |             |             |             |

## References

- 1) H. Nakamoto, M. Watanabe, *Chem. Commun.* **2007**, 2539-2541.
- 2) T. E. Faber, J. M. Ziman, *Philos. Mag.* **1965**, *11*, 153-173.
- 3) S. Kohara, M. Itou, K. Suzuya, Y. Inamura, Y. Sakurai, Y. Ohishi, M. Takata, *J. Phys. Condens. Matter* **2007**, *19*, 506101.
- 4) E. Lorch, *J. Phys. C: Solid State Phys.* **1969**, *2*, 229-237.
- 5) O. Gereben, P. Jóvári, L. Temleitner, L. Pusztai, *J. Optoelectron. Adv. Mater.* **2007**, *9*, 3021–3027.
- 6) A. L. Ankudinov, B. Ravel, J. J. Rehr, S. D. Conradson, *Phys. Rev. B* **1998**, *58*, 7565-7576.
